# Supplementary material for: Molecular evolution of GDP-L-galactose phosphorylase, a key regulatory gene in plant ascorbate biosynthesis
Source: PubMed Central journal article supplement (PMC7640755; doi:10.1093/aobpla/plaa055), 2020-11-04
Supplement: plaa055_suppl_supplementary_material.pdf [file plaa055_suppl_supplementary_material.pdf]

**Table S2. Results of site models for detection of positively selected sites in plant *GGP* genes.**

| Model      | Np <sup>a</sup> | lnL <sup>b</sup> | Parameters                                                                 | Models compared | d.f. <sup>c</sup> | -2ΔlnL <sup>d</sup> | p-value | Positively selected sites |
|------------|-----------------|------------------|----------------------------------------------------------------------------|-----------------|-------------------|---------------------|---------|---------------------------|
| <b>M0</b>  | 297             | -49065.194       | ω=0.09302                                                                  |                 |                   |                     |         | none                      |
| <b>M3</b>  | 301             | -47596.378       | p0=0.38716, ω0=0.01357<br>P1=0.40745, ω1=0.08947<br>P2=0.20538, ω2=0.27976 | M3 vs. M0       | 4                 | 2937.632***         | 0.000   | none                      |
| <b>M1a</b> | 298             | -48824.857       | p0=0.88231, ω0=0.08702<br>p1=0.11769, ω1=1.0000                            |                 |                   |                     |         | Not allowed               |
| <b>M2a</b> | 300             | -48824.857       | p0=0.88232, ω0=0.08702;<br>p1=0.11768 ω1=1.000;<br>p2=0.0, ω2=7.98423      | M2a vs. M1a     | 2                 | 0                   | 1.000   | none                      |
| <b>M7</b>  | 298             | -47538.644       | p=0.66833, q=5.72263                                                       |                 |                   |                     |         | Not allowed               |
| <b>M8</b>  | 300             | -47538.647       | p0=0.99999, p=0.66832<br>q=5.72257<br>p1=0.00001, ω=2.73695                | M8 vs. M7       | 2                 | 0.006               | 0.997   | none                      |

<sup>a</sup> Np: number of estimated parameters;

<sup>b</sup> lnL: log likelihood score;

<sup>c</sup> df : degrees of freedom;

<sup>d</sup> -2ΔlnL: twice the log-likelihood difference of the model compared.

\*\*\*Significant at  $p < 0.0001$ .

**Table S3. Results of branch-site test by treating each main lineages in the phylogeny as the foreground branch**

| Foreground branch | Model      | lnL <sup>a</sup> | Parameter estimates                                                                                                                                                                       | -2ΔlnL <sup>b</sup> | d.f. <sup>c</sup> | p-value | Positively Selected sites |
|-------------------|------------|------------------|-------------------------------------------------------------------------------------------------------------------------------------------------------------------------------------------|---------------------|-------------------|---------|---------------------------|
| Angiosperms       | Model A    | -48816.091       | p0 = 0.865, p1 = 0.077 p2a = 0.054,<br>p2b = 0.005<br>background: ω0 = 0.086, ω1 = 1.000<br>ω2a = 0.086, ω2b = 1.000<br>foreground: ω0 = 0.086, ω1 = 1.000,<br>ω2a = 1.000, ω2b = 1.000   | 0                   | 1                 | 1       |                           |
|                   | Null model | -48816.091       | p0 = 0.865, p1 = 0.077, p2a = 0.054,<br>p2b = 0.005<br>background: ω0 = 0.086, ω1 = 1.000,<br>ω2a = 0.086, ω2b = 1.000<br>foreground: ω0 = 0.086, ω1 = 1.000,<br>ω2a = 1.000, ω2b = 1.000 |                     |                   |         |                           |
| Angiosperms 1     | Model A    | -48787.112       | p0 = 0.876, p1 = 0.083, p2a = 0.038,<br>p2b = 0.004<br>background: ω0 = 0.087, ω1 = 1.000,<br>ω2a = 0.087, ω2b = 1.000<br>foreground: ω0 = 0.087, ω1 = 1.000,<br>ω2a = 1.000, ω2b = 1.000 | 0                   | 1                 | 1       | 16L (1.000); 254Q (1.000) |
|                   | Null model | -48787.112       | p0 = 0.876, p1 = 0.083, p2a = 0.038,<br>p2b = 0.004<br>background: ω0 = 0.087, ω1 = 1.000,<br>ω2a = 0.087, ω2b = 1.000<br>foreground: ω0 = 0.087, ω1 = 1.000,                             |                     |                   |         |                           |

|                      |            |            |                                                                                                                                                                                                                                                                                                                     |   |   |   |                                                                                                |
|----------------------|------------|------------|---------------------------------------------------------------------------------------------------------------------------------------------------------------------------------------------------------------------------------------------------------------------------------------------------------------------|---|---|---|------------------------------------------------------------------------------------------------|
| <b>Angiosperms 2</b> | Model A    | -48764.624 | $\omega_{2a} = 1.000, \omega_{2b} = 1.000$<br>$p_0 = 0.839, p_1 = 0.091, p_{2a} = 0.063,$<br>$p_{2b} = 0.007$<br>background: $\omega_0 = 0.086, \omega_1 = 1.000,$<br>$\omega_{2a} = 0.086, \omega_{2b} = 1.000$<br>foreground: $\omega_0 = 0.086, \omega_1 = 1.000,$<br>$\omega_{2a} = 1.000, \omega_{2b} = 1.000$ | 0 | 1 | 1 | 17G (0.997); 28S (0.941);35E (0.955);<br>45A (0.999);78Q (0.942); 82P (0.999);<br>107A (1.000) |
|                      | Null model | -48764.624 | $p_0 = 0.834, p_1 = 0.091, p_{2a} = 0.063,$<br>$p_{2b} = 0.007$<br>background: $\omega_0 = 0.086, \omega_1 = 1.000,$<br>$\omega_{2a} = 0.086, \omega_{2b} = 1.000$<br>foreground: $\omega_0 = 0.086, \omega_1 = 1.000,$<br>$2a = 1.000, \omega_{2b} = 1.000$                                                        |   |   |   |                                                                                                |
| <b>Eudicots 1</b>    | Model A    | -48805.662 | $p_0 = 0.857, p_1 = 0.105, p_{2a} = 0.034,$<br>$p_{2b} = 0.004$<br>background: $\omega_0 = 0.087, \omega_1 = 1.000,$<br>$\omega_{2a} = 0.087, \omega_{2b} = 1.000$<br>foreground: $\omega_0 = 0.087, \omega_1 = 1.000,$<br>$\omega_{2a} = 1.000, \omega_{2b} = 1.000$                                               | 0 | 1 | 1 | 254Q (1.000)                                                                                   |
|                      | Null model | -48805.662 | $p_0 = 0.857, p_1 = 0.105, p_{2a} = 0.034,$<br>$p_{2b} = 0.004$<br>background: $\omega_0 = 0.087, \omega_1 = 1.000,$<br>$\omega_{2a} = 0.087, \omega_{2b} = 1.000$<br>foreground: $\omega_0 = 0.087, \omega_1 = 1.000,$<br>$\omega_{2a} = 1.000, \omega_{2b} = 1.000$                                               |   |   |   |                                                                                                |
| <b>Eudicots 2</b>    | Model A    | -48783.609 | $p_0 = 0.828, p_1 = 0.100, p_{2a} = 0.064,$                                                                                                                                                                                                                                                                         | 0 | 1 | 1 | 19S (0.996); 45A (1.000);                                                                      |

---

|                   |            |            |                                                                                                                                                                                                                                                                         |   |   |   |                                                                                                                                                                                                                                                                                                                                                                                                    |
|-------------------|------------|------------|-------------------------------------------------------------------------------------------------------------------------------------------------------------------------------------------------------------------------------------------------------------------------|---|---|---|----------------------------------------------------------------------------------------------------------------------------------------------------------------------------------------------------------------------------------------------------------------------------------------------------------------------------------------------------------------------------------------------------|
|                   |            |            | p2b = 0.008<br>background: $\omega_0 = 0.086$ , $\omega_1 = 1.000$ ,<br>$\omega_{2a} = 0.086$ , $\omega_{2b} = 1.000$<br>foreground: $\omega_0 = 0.086$ , $\omega_1 = 1.000$ ,<br>$\omega_{2a} = 1.000$ , $\omega_{2b} = 1.000$                                         |   |   |   | 82P (0.996);107A (0.991);<br>125Q (0.922);137E (1.000);<br>145M (1.000);155L (0.938)                                                                                                                                                                                                                                                                                                               |
|                   | Null model | -48783.609 | p0 = 0.828, p1 = 0.100, p2a = 0.064,<br>p2b = 0.008<br>background: $\omega_0 = 0.086$ , $\omega_1 = 1.000$ ,<br>$\omega_{2a} = 0.086$ , $\omega_{2b} = 1.000$<br>foreground: $\omega_0 = 0.086$ , $\omega_1 = 1.000$ ,<br>$\omega_{2a} = 1.000$ , $\omega_{2b} = 1.000$ |   |   |   |                                                                                                                                                                                                                                                                                                                                                                                                    |
| <b>Monocots 1</b> | Model A    | -48739.115 | p0 = 0.715, p1 = 0.106, p2a = 0.156,<br>p2b = 0.023<br>background: $\omega_0 = 0.083$ , $\omega_1 = 1.000$ ,<br>$\omega_{2a} = 0.083$ , $\omega_{2b} = 1.000$<br>foreground: $\omega_0 = 0.083$ , $\omega_1 = 1.000$ ,<br>$\omega_{2a} = 1.000$ , $\omega_{2b} = 1.000$ | 0 | 1 | 1 | 1T (1.000); 2V (0.963); 3V (0.997);<br>5I (1.000); 6N (0.964); 7Q (0.998);<br>8- (0.999); 9- (0.929);15- (1.000);<br>18A (0.998); 25D (0.997); 27L(0.988);<br>28S (0.999); 44T (0.947); 59A (0.996);<br>60Q (0.992); 75R (0.924); 94D (0.97);<br>110V(0.999);179P(1.000);194S<br>(1.000);<br>214N (1.000); 248A(0.998);265V<br>(0.987);<br>287Y (1.000);288A (0.996);<br>298E (0.948);299D (0.993) |
|                   | Null model | -48739.115 | p0 = 0.715, p1 = 0.106, p2a = 0.156,<br>p2b = 0.023<br>background: $\omega_0 = 0.083$ , $\omega_1 = 1.000$ ,                                                                                                                                                            |   |   |   |                                                                                                                                                                                                                                                                                                                                                                                                    |

---

---

|                    |            |            |                                                                                                                                                                                                                                                                                                                                                                                                                        |   |   |   |                                       |
|--------------------|------------|------------|------------------------------------------------------------------------------------------------------------------------------------------------------------------------------------------------------------------------------------------------------------------------------------------------------------------------------------------------------------------------------------------------------------------------|---|---|---|---------------------------------------|
| <b>Monocots 2</b>  | Model A    | -48813.117 | $\omega_{2a} = 0.083, \omega_{2b} = 1.000$<br>foreground: $\omega_0 = 0.083, \omega_1 = 1.000,$<br>$\omega_{2a} = 1.000, \omega_{2b} = 1.000$<br>$p_0 = 0.840, p_1 = 0.110, p_{2a} = 0.045,$<br>$p_{2b} = 0.006$<br>background: $\omega_0 = 0.087, \omega_1 = 1.000,$<br>$\omega_{2a} = 0.087, \omega_{2b} = 1.000$<br>foreground: $\omega_0 = 0.087, \omega_1 = 1.000,$<br>$\omega_{2a} = 1.000, \omega_{2b} = 1.000$ | 0 | 1 | 1 | 12- (0.999); 28S (1.000); 78Q (0.964) |
|                    | Null model | -48813.117 | $p_0 = 0.840, p_1 = 0.110, p_{2a} = 0.045,$<br>$p_{2b} = 0.006$<br>background: $\omega_0 = 0.087, \omega_1 = 1.000,$<br>$\omega_{2a} = 0.087, \omega_{2b} = 1.000$<br>foreground: $\omega_0 = 0.087, \omega_1 = 1.000,$<br>$\omega_{2a} = 1.000, \omega_{2b} = 1.000$                                                                                                                                                  |   |   |   |                                       |
| <b>Gymnosperms</b> | Model A    | -48826.351 | $p_0 = 0.829, p_1 = 0.128, p_{2a} = 0.037,$<br>$p_{2b} = 0.006$<br>background: $\omega_0 = 0.087, \omega_1 = 1.000,$<br>$\omega_{2a} = 0.087, \omega_{2b} = 1.000$<br>foreground: $\omega_0 = 0.087, \omega_1 = 1.000,$<br>$\omega_{2a} = 1.000, \omega_{2b} = 1.000$                                                                                                                                                  | 0 | 1 | 1 | 2V (0.991); 152Y (0.995)              |
|                    | Null model | -48826.351 | $p_0 = 0.829, p_1 = 0.128, p_{2a} = 0.037,$<br>$p_{2b} = 0.006$<br>background: $\omega_0 = 0.087, \omega_1 = 1.000,$<br>$\omega_{2a} = 0.087, \omega_{2b} = 1.000$<br>foreground: $\omega_0 = 0.087, \omega_1 = 1.000,$                                                                                                                                                                                                |   |   |   |                                       |

---

---

|                     |            |            |                                                                                                                                                                                                                                                                                                                     |       |   |       |                                                                                                                                                                                                                                                                                                                                                                                                                                                                                          |
|---------------------|------------|------------|---------------------------------------------------------------------------------------------------------------------------------------------------------------------------------------------------------------------------------------------------------------------------------------------------------------------|-------|---|-------|------------------------------------------------------------------------------------------------------------------------------------------------------------------------------------------------------------------------------------------------------------------------------------------------------------------------------------------------------------------------------------------------------------------------------------------------------------------------------------------|
| <b>Chlorophytes</b> | Model A    | -48674.379 | $\omega_{2a} = 1.000, \omega_{2b} = 1.000$<br>$p_0 = 0.587, p_1 = 0.088, p_{2a} = 0.283,$<br>$p_{2b} = 0.042$<br>background: $\omega_0 = 0.083, \omega_1 = 1.000,$<br>$\omega_{2a} = 0.083, \omega_{2b} = 1.000$<br>foreground: $\omega_0 = 0.083, \omega_1 = 1.000,$<br>$\omega_{2a} = 1.000, \omega_{2b} = 1.000$ | 0     | 1 | 1     | 5I (0.998); 6N (0.998); 11- (0.999);<br>12- (0.999); 18A (0.998); 19S (1.000);<br>22L (1.000); 47E (1.000); 75R (1.000);<br>80L (1.000); 96Q (0.991); 101A<br>(1.000);<br>135C(1.000); 148V(1.000);<br>190G(0.998); 214N (1.000); 215A<br>(0.999); 216C (0.903);<br>217I (1.000); 242C (1.000); 245E<br>(0.988); 249R (0.994); 251E<br>(1.000); 277R (1.000);<br>284T (1.000); 287Y (1.000); 289K<br>(1.000); 294E (1.000); 297S<br>(1.000); 300R (0.938);<br>304V (0.953); 305K (0.994) |
|                     | Null model | -48674.379 | $p_0 = 0.587, p_1 = 0.088, p_{2a} = 0.283,$<br>$p_{2b} = 0.042$<br>background: $\omega_0 = 0.083, \omega_1 = 1.000,$<br>$\omega_{2a} = 0.083, \omega_{2b} = 1.000$<br>foreground; $\omega_0 = 0.083, \omega_1 = 1.000,$<br>$\omega_{2a} = 1.000, \omega_{2b} = 1.000$                                               |       |   |       |                                                                                                                                                                                                                                                                                                                                                                                                                                                                                          |
| <b>Lycophytes</b>   | Model A    | -48822.348 | $p_0 = 0.814, p_1 = 0.128, p_{2a} = 0.050,$<br>$p_{2b} = 0.008$<br>background: $\omega_0 = 0.087, \omega_1 = 1.000,$<br>$\omega_{2a} = 0.087, \omega_{2b} = 1.000$                                                                                                                                                  | 0.592 | 1 | 0.442 | 27L (0.989); 31E (0.958);<br>112A (0.971); 179P (0.999);<br>222D (0.956); 300R (0.979)                                                                                                                                                                                                                                                                                                                                                                                                   |

---

---

|                   |            |            |                                                                                                        |   |   |   |              |
|-------------------|------------|------------|--------------------------------------------------------------------------------------------------------|---|---|---|--------------|
|                   |            |            | foreground: $\omega_0 = 0.087$ , $\omega_1 = 1.000$ ,<br>$\omega_{2a} = 1.626$ , $\omega_{2b} = 1.626$ |   |   |   |              |
|                   | Null model | -48822.644 | $p_0 = 0.801$ , $p_1 = 0.127$ , $p_{2a} = 0.063$ ,<br>$p_{2b} = 0.010$                                 |   |   |   |              |
|                   |            |            | background: $\omega_0 = 0.087$ , $\omega_1 = 1.000$ ,<br>$\omega_{2a} = 0.087$ , $\omega_{2b} = 1.000$ |   |   |   |              |
|                   |            |            | foreground: $\omega_0 = 0.087$ , $\omega_1 = 1.000$ ,<br>$\omega_{2a} = 1.000$ , $\omega_{2b} = 1.000$ |   |   |   |              |
| <b>Bryophytes</b> | Model A    | -48829.428 | $p_0 = 0.850$ , $p_1 = 0.123$ , $p_{2a} =$<br>$0.0235$ , $p_{2b} = 0.003$                              | 0 | 1 | 1 | 222D (0.991) |
|                   |            |            | background: $\omega_0 = 0.088$ , $\omega_1 = 1.000$ ,<br>$\omega_{2a} = 0.088$ , $\omega_{2b} = 1.000$ |   |   |   |              |
|                   |            |            | foreground: $\omega_0 = 0.088$ , $\omega_1 = 1.000$ ,<br>$\omega_{2a} = 1.000$ , $\omega_{2b} = 1.000$ |   |   |   |              |
|                   | Null model | -48829.428 | $p_0 = 0.851$ , $p_1 = 0.123$ , $p_{2a} = 0.023$ ,<br>$p_{2b} = 0.003$                                 |   |   |   |              |
|                   |            |            | background: $\omega_0 = 0.088$ , $\omega_1 = 1.000$ ,<br>$\omega_{2a} = 0.088$ , $\omega_{2b} = 1.000$ |   |   |   |              |
|                   |            |            | foreground: $\omega_0 = 0.088$ , $\omega_1 = 1.000$ ,<br>$\omega_{2a} = 1.000$ , $\omega_{2b} = 1.000$ |   |   |   |              |

---

<sup>a</sup> lnL: log-likelihood scores.

<sup>b</sup>  $-2\Delta\ln L$ : twice the log-likelihood difference of the models being compared.

<sup>c</sup> d.f.: degree of freedom.

**Table S4. Results of branch-site tests by treating each branch in the phylogeny as the foreground branch.**

| Foreground branches                               | Model      | lnL <sup>a</sup> | Parameter estimates                                                                                                                                                                          | -2ΔlnL <sup>b</sup> | d.f. <sup>c</sup> | p-value | Positively Selected sites                                                                                                    |
|---------------------------------------------------|------------|------------------|----------------------------------------------------------------------------------------------------------------------------------------------------------------------------------------------|---------------------|-------------------|---------|------------------------------------------------------------------------------------------------------------------------------|
| <i>Ananas comosus</i><br>( <i>AncGGP-3</i> )      | Model A    | -48817.404       | p0 = 0.784, p1 = 0.125, p2a = 0.079,<br>p2b = 0.013<br>Background: ω0 = 0.087, ω1 = 1.000,<br>ω2a = 0.087, ω2b = 1.000<br>Foreground: ω0 = 0.087, ω1 = 1.0000<br>ω2a = 5.443, ω2b = 5.443    | 8.041               | 1                 | 0.0046* | 1T (0.987); 7Q (0.987); 59A (0.981);<br>60Q (0.965); 214N (0.992); 245E (0.984);<br>265V (0.993); 287Y (0.991); 303E (0.992) |
|                                                   | Null model | -48821.424       | p0 = 0.717, p1 = 0.115, p2a = 0.145,<br>p2b = 0.023<br>Background: ω0 = 0.086, ω1 = 1.000,<br>ω2a = 0.086, ω2b = 1.000<br>Foreground: ω0 = 0.086, ω1 = 1.000,<br>ω2a = 1.000, ω2b = 1.000    |                     |                   |         |                                                                                                                              |
| <i>Arabidopsis thaliana</i><br>( <i>AtGGP-1</i> ) | Model A    | -48830.433       | p0 = 0.860, p1 = 0.137, p2a = 0.003,<br>p2b = 0.00046<br>Background: ω0 = 0.087 ω1 = 1.000,<br>ω2a = 0.087, ω2b = 1.000<br>Foreground: ω0 = 0.087, ω1 = 1.000,<br>ω2a = 43.808, ω2b = 43.808 | 5.493               | 1                 | 0.019*  | 215A (0.995)                                                                                                                 |
|                                                   | Null model | -48833.180       | p0 = 0.808, p1 = 0.129, p2a = 0.055,<br>p2b = 0.009<br>Background: ω0 = 0.087 ω1 = 1.000,<br>ω2a = 0.087, ω2b = 1.000<br>Foreground: ω0 = 0.087, ω1 = 1.000,                                 |                     |                   |         |                                                                                                                              |



|                                         |            |            |                                                                                                                                                                                                                                                               |        |   |          |                                                                |
|-----------------------------------------|------------|------------|---------------------------------------------------------------------------------------------------------------------------------------------------------------------------------------------------------------------------------------------------------------|--------|---|----------|----------------------------------------------------------------|
|                                         |            |            | $\omega_{2a} = 1.000, \omega_{2b} = 1.000$                                                                                                                                                                                                                    |        |   |          |                                                                |
| <i>Brachypodium_stacei</i><br>(BsGGP-1) | Model A    | -48830.372 | p0 = 0.861, p1 = 0.137, p2a = 0.002,<br>p2b = 0.00033<br>Background: $\omega_0 = 0.087, \omega_1 = 1.000,$<br>$\omega_{2a} = 0.087, \omega_{2b} = 1.000$<br>Foreground: $\omega_0 = 0.087, \omega_1 = 1.000,$<br>$\omega_{2a} = 76.292, \omega_{2b} = 76.292$ | 5.983  | 1 | 0.014*   | 187T (0.995)                                                   |
|                                         | Null model | -48833.364 | p0 = 0.82, p1 = 0.13, p2a = 0.043, p2b = 0.007<br>Background: $\omega_0 = 0.088, \omega_1 = 1.000,$<br>$\omega_{2a} = 0.088, \omega_{2b} = 1.000$<br>Foreground: $\omega_0 = 0.088, \omega_1 = 1.000,$<br>$\omega_{2a} = 1.000, \omega_{2b} = 1.000$          |        |   |          |                                                                |
| <i>Brassica_oleracea</i><br>(BoGGP-2)   | Model A    | -48810.375 | p0 = 0.838, p1 = 0.134, p2a = 0.025,<br>p2b = 0.004<br>Background: $\omega_0 = 0.087, \omega_1 = 1.000,$<br>$\omega_{2a} = 0.087, \omega_{2b} = 1.000$<br>Foreground: $\omega_0 = 0.087, \omega_1 = 1.000,$<br>$\omega_{2a} = 23.625, \omega_{2b} = 23.625$   | 26.261 | 1 | 0.0000** | 1T (0.975); 5I (1.000); 6N (0.999);<br>7Q (0.999); 15- (1.000) |
|                                         | Null model | -48823.506 | p0 = 0.715, p1 = 0.114, p2a = 0.148,<br>p2b = 0.024<br>Background: $\omega_0 = 0.087, \omega_1 = 1.000,$<br>$\omega_{2a} = 0.087, \omega_{2b} = 1.000$<br>Foreground: $\omega_0 = 0.087, \omega_1 = 1.000,$<br>$\omega_{2a} = 1.000, \omega_{2b} = 1.000$     |        |   |          |                                                                |
| <i>Brassica_rapa</i>                    | Model A    | -48805.884 | p0 = 0.816, p1 = 0.13, p2a = 0.047, p2b                                                                                                                                                                                                                       | 20.204 | 1 | 0.0000** | 1T (0.969); 17G (0.960); 51L (0.969);                          |

|                                                     |            |            |                                                                                                                                                                                                                                                                                              |        |   |          |                                                                                                                                                                                                                                          |
|-----------------------------------------------------|------------|------------|----------------------------------------------------------------------------------------------------------------------------------------------------------------------------------------------------------------------------------------------------------------------------------------------|--------|---|----------|------------------------------------------------------------------------------------------------------------------------------------------------------------------------------------------------------------------------------------------|
| <i>(BrGGP-4)</i>                                    |            |            | = 0.007<br>Background: $\omega_0 = 0.087$ , $\omega_1 = 1.000$ ,<br>$\omega_{2a} = 0.087$ , $\omega_{2b} = 1.000$<br>Foreground: $\omega_0 = 0.087$ , $\omega_1 = 1.000$ ,<br>$\omega_{2a} = 45.8$ , $\omega_{2b} = 45.8$                                                                    |        |   |          | 75R (0.969); 107A (0.965); 207E (0.961);<br>225P (0.966); 251E (0.967); 281D (0.967);<br>283A (0.998); 284T (1.000); 285E (0.965);<br>287Y (1.000); 288A (0.965); 289K (0.995)                                                           |
|                                                     | Null model | -48815.986 | $p_0 = 0.334$ , $p_1 = 0.053$ , $p_{2a} = 0.528$ ,<br>$p_{2b} = 0.084$<br>Background: $\omega_0 = 0.087$ , $\omega_1 = 1.000$ ,<br>$\omega_{2a} = 0.087$ , $\omega_{2b} = 1.000$<br>Foreground: $\omega_0 = 0.087$ , $\omega_1 = 1.000$ ,<br>$\omega_{2a} = 1.000$ , $\omega_{2b} = 1.000$   |        |   |          |                                                                                                                                                                                                                                          |
| <i>Chlamydomonas reinhardtii</i><br><i>(ChrGGP)</i> | Model A    | -48800.092 | $p_0 = 0.728$ , $p_1 = 0.112$ , $p_{2a} = 0.139$ ,<br>$p_{2b} = 0.021$<br>Background: $\omega_0 = 0.087$ , $\omega_1 = 1.000$ ,<br>$\omega_{2a} = 0.087$ , $\omega_{2b} = 1.000$<br>Foreground: $\omega_0 = 0.087$ , $\omega_1 = 1.000$ ,<br>$\omega_{2a} = 27.048$ , $\omega_{2b} = 27.048$ | 36.411 | 1 | 0.0000*  | 11- (0.999); 12- (0.999); 22L (0.960); 47E<br>(0.956); 87K (1.000); 148V (0.998); 151P<br>(0.999); 152Y (0.999); 159S (1.000); 203T<br>(0.951); 230I (1.000); 265V (0.953); 284T<br>(0.996); 289K (0.994); 294E (1.000); 297S<br>(0.998) |
|                                                     | Null model | -48818.298 | $p_0 = 0.723$ , $p_1 = 0.112$ , $p_{2a} = 0.144$ ,<br>$p_{2b} = 0.022$<br>Background: $\omega_0 = 0.087$ , $\omega_1 = 1.000$ ,<br>$\omega_{2a} = 0.087$ , $\omega_{2b} = 1.000$<br>Foreground: $\omega_0 = 0.087$ , $\omega_1 = 1.000$ ,<br>$\omega_{2a} = 1.000$ , $\omega_{2b} = 1.000$   |        |   |          |                                                                                                                                                                                                                                          |
| <i>Coccomyxa subellipsoidea</i><br><i>(CosGGP)</i>  | Model A    | -48808.925 | $p_0 = 0.7$ , $p_1 = 0.114$ , $p_{2a} = 0.161$ , $p_{2b} =$<br>0.026<br>Background: $\omega_0 = 0.087$ , $\omega_1 = 1.000$ ,                                                                                                                                                                | 17.84  | 1 | 0.0000** | 2V (0.997); 5I (0.992); 6N (0.978); 7Q<br>(1.000); 47E (0.958); 94D (0.999); 131P<br>(0.997); 135C (0.999); 140L (0.995); 190G                                                                                                           |

|                                        |            |            |                                                                                                                                                                                                                                                                                            |        |   |          |                                                                                                                                                                                                              |
|----------------------------------------|------------|------------|--------------------------------------------------------------------------------------------------------------------------------------------------------------------------------------------------------------------------------------------------------------------------------------------|--------|---|----------|--------------------------------------------------------------------------------------------------------------------------------------------------------------------------------------------------------------|
|                                        |            |            | $\omega_{2a} = 0.087$ $\omega_{2b} = 1.000$<br>Foreground: $\omega_0 = 0.087$ , $\omega_1 = 1.000$ ,<br>$\omega_{2a} = 7.241$ , $\omega_{2b} = 7.241$                                                                                                                                      |        |   |          | (0.975); 220Q (1.000); 241Q (0.990); 245E (0.985); 246R (0.997); 251E (0.984); 260Q (0.985); 287Y (0.993); 296L (0.996); 300R (0.983)                                                                        |
|                                        | Null model | -48817.845 | $p_0 = 0.713$ , $p_1 = 0.115$ $p_{2a} = 0.148$ $p_{2b} = 0.024$<br>Background: $\omega_0 = 0.086$ , $\omega_1 = 1.000$ ,<br>$\omega_{2a} = 0.086$ , $\omega_{2b} = 1.000$<br>Foreground: $\omega_0 = 0.086$ , $\omega_1 = 1.000$ ,<br>$\omega_{2a} = 1.000$ , $\omega_{2b} = 1.000$        |        |   |          |                                                                                                                                                                                                              |
| <i>Dunaliella salina</i><br>(DsGGP)    | Model A    | -48808.785 | $p_0 = 0.724$ , $p_1 = 0.114$ , $p_{2a} = 0.14$ , $p_{2b} = 0.022$<br>Background: $\omega_0 = 0.087$ , $\omega_1 = 1.000$ ,<br>$\omega_{2a} = 0.087$ , $\omega_{2b} = 1.000$<br>Foreground: $\omega_0 = 0.087$ , $\omega_1 = 1.000$ ,<br>$\omega_{2a} = 21.654$ , $\omega_{2b} = 21.654$   | 29.163 | 1 | 0.0000** | 4S (0.999); 6N (0.990); 75R (0.996); 80L (0.990); 84D (0.998); 94D (0.953); 134I(0.989); 215A(0.999); 217I(1.000); 226F(0.953); 240I(0.999); 242C(0.968); 246R(0.999); 283A(0.995); 284T(0.992); 297S(0.996) |
|                                        | Null model | -48823.367 | $p_0 = 0.747$ , $p_1 = 0.118$ , $p_{2a} = 0.116$ ,<br>$p_{2b} = 0.018$<br>Background: $\omega_0 = 0.087$ , $\omega_1 = 1.000$ ,<br>$\omega_{2a} = 0.087$ , $\omega_{2b} = 1.000$<br>Foreground: $\omega_0 = 0.087$ , $\omega_1 = 1.000$ ,<br>$\omega_{2a} = 1.000$ , $\omega_{2b} = 1.000$ |        |   |          |                                                                                                                                                                                                              |
| <i>Eucalyptus grandis</i><br>(EgGGP-5) | Model A    | -48818.108 | $p_0 = 0.832$ , $p_1 = 0.133$ , $p_{2a} = 0.031$ ,<br>$p_{2b} = 0.005$<br>Background: $\omega_0 = 0.087$ , $\omega_1 = 1.000$ ,<br>$\omega_{2a} = 0.087$ , $\omega_{2b} = 1.000$                                                                                                           | 12.113 | 1 | 0.0005*  | 37G (0.968); 62N (1.000); 63E (1.000); 125Q (0.966); 135C (0.965); 216C (0.968); 264A (0.967); 284T (0.969)                                                                                                  |

|                                                  |            |            |                                                                                                                                                                                                                                                                                                        |       |   |        |                                          |
|--------------------------------------------------|------------|------------|--------------------------------------------------------------------------------------------------------------------------------------------------------------------------------------------------------------------------------------------------------------------------------------------------------|-------|---|--------|------------------------------------------|
|                                                  |            |            | Foreground: $\omega_0 = 0.087$ , $\omega_1 = 1.000$ ,<br>$\omega_{2a} = 59.268$ , $\omega_{2b} = 59.268$                                                                                                                                                                                               |       |   |        |                                          |
|                                                  | Null model | -48824.164 | $p_0 = 0.379$ , $p_1 = 0.06$ , $p_{2a} = 0.484$ , $p_{2b} = 0.077$<br><br>Background: $\omega_0 = 0.087$ , $\omega_1 = 1.000$ ,<br>$\omega_{2a} = 0.087$ , $\omega_{2b} = 1.000$<br><br>Foreground: $\omega_0 = 0.087$ , $\omega_1 = 1.000$ ,<br>$\omega_{2a} = 1.000$ , $\omega_{2b} = 1.000$         |       |   |        |                                          |
| <i>Glycine max</i><br>( <i>GmGGP-4</i> )         | Model A    | -48824.508 | $p_0 = 0.858$ , $p_1 = 0.137$ , $p_{2a} = 0.005$ ,<br>$p_{2b} = 0.00079$<br><br>Background: $\omega_0 = 0.087$ , $\omega_1 = 1.000$ ,<br>$\omega_{2a} = 0.087$ , $\omega_{2b} = 1.000$<br><br>Foreground: $\omega_0 = 0.087$ , $\omega_1 = 1.000$ ,<br>$\omega_{2a} = 73.352$ , $\omega_{2b} = 73.352$ | 8.194 | 1 | 0.004* | 304V (0.998); 305K (0.997)               |
|                                                  | Null model | -48828.605 | $p_0 = 0.71$ , $p_1 = 0.113$ , $p_{2a} = 0.152$ , $p_{2b} = 0.024$<br><br>Background: $\omega_0 = 0.087$ , $\omega_1 = 1.000$ ,<br>$\omega_{2a} = 0.087$ , $\omega_{2b} = 1.000$<br><br>Foreground: $\omega_0 = 0.087$ , $\omega_1 = 1.000$ ,<br>$\omega_{2a} = 1.000$ , $\omega_{2b} = 1.000$         |       |   |        |                                          |
| <i>Marchantia polymorpha</i><br>( <i>MpGGP</i> ) | Model A    | -48827.668 | $p_0 = 0.838$ , $p_1 = 0.133$ , $p_{2a} = 0.025$ ,<br>$p_{2b} = 0.004$<br><br>Background: $\omega_0 = 0.087$ , $\omega_1 = 1.000$ ,<br>$\omega_{2a} = 0.087$ , $\omega_{2b} = 1.000$<br><br>Foreground: $\omega_0 = 0.087$ , $\omega_1 = 1.000$ ,<br>$\omega_{2a} = 7.806$ , $\omega_{2b} = 7.806$     | 8.527 | 1 | 0.003* | 127K (0.982); 128S (0.955); 203T (0.970) |

|                                                 |            |            |                                                                                                                                                                                                                                                                           |        |   |          |                                                                                                                                                                           |
|-------------------------------------------------|------------|------------|---------------------------------------------------------------------------------------------------------------------------------------------------------------------------------------------------------------------------------------------------------------------------|--------|---|----------|---------------------------------------------------------------------------------------------------------------------------------------------------------------------------|
|                                                 | Null model | -48831.931 | p0 = 0.834, p1 = 0.133, p2a = 0.029,<br>p2b = 0.005<br>Background: $\omega_0 = 0.087$ , $\omega_1 = 1.000$ ,<br>$\omega_{2a} = 0.087$ $\omega_{2b} = 1.000$<br>Foreground: $\omega_0 = 0.087$ , $\omega_1 = 1.000$ ,<br>$\omega_{2a} = 1.000$ , $\omega_{2b} = 1.000$     |        |   |          |                                                                                                                                                                           |
| <i>Micromonas pusilla</i><br>( <i>MpGGP</i> )   | Model A    | -48803.535 | p0 = 0.728, p1 = 0.112, p2a = 0.138,<br>p2b = 0.021<br>Background: $\omega_0 = 0.087$ , $\omega_1 = 1.000$ ,<br>$\omega_{2a} = 0.087$ , $\omega_{2b} = 1.000$<br>Foreground: $\omega_0 = 0.087$ , $\omega_1 = 1.000$ ,<br>$\omega_{2a} = 13.253$ , $\omega_{2b} = 13.253$ | 26.221 | 1 | 0.0000** | 15- (0.999); 19S (0.993); 75R (0.998);<br>123V (1.000); 214N (0.977); 215A (0.977);<br>241Q (0.999); 242C (1.000); 284T (0.999);<br>289K (0.989)                          |
|                                                 | Null model | -48816.645 | p0 = 0.675, p1 = 0.105, p2a = 0.19, p2b<br>= 0.03<br>Background: $\omega_0 = 0.086$ , $\omega_1 = 1.000$ ,<br>$\omega_{2a} = 0.086$ $\omega_{2b} = 1.000$<br>Foreground: $\omega_0 = 0.086$ , $\omega_1 = 1.000$ ,<br>$\omega_{2a} = 1.000$ , $\omega_{2b} = 1.000$       |        |   |          |                                                                                                                                                                           |
| <i>Micromonas sp RCC299</i><br>( <i>MsGGP</i> ) | Model A    | -48804.458 | p0 = 0.793, p1 = 0.126, p2a = 0.07, p2b<br>= 0.011<br>Background: $\omega_0 = 0.087$ , $\omega_1 = 1.000$ ,<br>$\omega_{2a} = 0.087$ , $\omega_{2b} = 1.000$<br>Foreground: $\omega_0 = 0.087$ , $\omega_1 = 1.000$ ,<br>$\omega_{2a} = 16.994$ , $\omega_{2b} = 16.994$  | 34.717 | 1 | 0.0000** | 4S (0.999); 12- (0.999); 22L (0.986);<br>47E (0.967); 80L (0.999); 101A (0.965);<br>107A (0.998); 138T (0.998); 215A (0.998);<br>287Y (0.998); 289K (0.964); 297S (0.999) |
|                                                 | Null model | -48821.817 | p0 = 0.755, p1 = 0.12, p2a = 0.108, p2b<br>= 0.017                                                                                                                                                                                                                        |        |   |          |                                                                                                                                                                           |

|                                      |            |            |                                                                                                                                                                                                                                                                                              |       |   |        |                           |
|--------------------------------------|------------|------------|----------------------------------------------------------------------------------------------------------------------------------------------------------------------------------------------------------------------------------------------------------------------------------------------|-------|---|--------|---------------------------|
|                                      |            |            | Background: $\omega_0 = 0.087$ , $\omega_1 = 1.000$ ,<br>$\omega_{2a} = 0.087$ $\omega_{2b} = 1.000$<br>Foreground: $\omega_0 = 0.087$ , $\omega_1 = 1.000$ ,<br>$\omega_{2a} = 1.000$ , $\omega_{2b} = 1.000$                                                                               |       |   |        |                           |
| <i>Mimulus guttatus</i><br>(MgGGP-2) | Mode A     | -48831.088 | $p_0 = 0.859$ , $p_1 = 0.137$ , $p_{2a} = 0.004$ ,<br>$p_{2b} = 0.001$<br>Background: $\omega_0 = 0.087$ , $\omega_1 = 1.000$ ,<br>$\omega_{2a} = 0.087$ , $\omega_{2b} = 1.000$<br>Foreground: $\omega_0 = 0.087$ , $\omega_1 = 1.000$ ,<br>$\omega_{2a} = 17.229$ , $\omega_{2b} = 17.229$ | 4.794 | 1 | 0.029* | 129Q (0.953)              |
|                                      | Null model | -48833.485 | $p_0 = 0.851$ , $p_1 = 0.136$ , $p_{2a} = 0.012$ ,<br>$p_{2b} = 0.002$<br>Background: $\omega_0 = 0.087$ , $\omega_1 = 1.000$ ,<br>$\omega_{2a} = 0.087$ $\omega_{2b} = 1.000$<br>Foreground: $\omega_0 = 0.087$ , $\omega_1 = 1.000$ ,<br>$\omega_{2a} = 1.000$ , $\omega_{2b} = 1.000$     |       |   |        |                           |
| <i>Musa acuminata</i><br>(MaGGP-1)   | ModelA     | -48831.56  | $p_0 = 0.856$ , $p_1 = 0.136$ , $p_{2a} = 0.007$ ,<br>$p_{2b} = 0.001$<br>Background: $\omega_0 = 0.087$ , $\omega_1 = 1.000$ ,<br>$\omega_{2a} = 0.087$ , $\omega_{2b} = 1.000$<br>Foreground: $\omega_0 = 0.087$ , $\omega_1 = 1.000$ ,<br>$\omega_{2a} = 9.465$ , $\omega_{2b} = 9.465$   | 4.01  | 1 | 0.045* | 29Q (0.983); 190G (0.984) |
|                                      | Null model | -48833.565 | $p_0 = 0.842$ , $p_1 = 0.134$ , $p_{2a} = 0.021$ ,<br>$p_{2b} = 0.003$<br>Background: $\omega_0 = 0.087$ , $\omega_1 = 1.000$ ,<br>$\omega_{2a} = 0.087$ $\omega_{2b} = 1.000$                                                                                                               |       |   |        |                           |

|                                                     |            |            |                                                                                                                                                                                                                                                                                              |        |   |          |                                                                                                                                                                                                                        |
|-----------------------------------------------------|------------|------------|----------------------------------------------------------------------------------------------------------------------------------------------------------------------------------------------------------------------------------------------------------------------------------------------|--------|---|----------|------------------------------------------------------------------------------------------------------------------------------------------------------------------------------------------------------------------------|
|                                                     |            |            | Foreground: $\omega_0 = 0.087$ , $\omega_1 = 1.000$ ,<br>$\omega_{2a} = 1.000$ , $\omega_{2b} = 1.000$                                                                                                                                                                                       |        |   |          |                                                                                                                                                                                                                        |
| <i>Ostreococcus lucimarinus</i><br>( <i>OIGGP</i> ) | Model A    | -48801.958 | $p_0 = 0.763$ , $p_1 = 0.115$ , $p_{2a} = 0.107$ ,<br>$p_{2b} = 0.016$<br>Background: $\omega_0 = 0.087$ , $\omega_1 = 1.000$ ,<br>$\omega_{2a} = 0.087$ , $\omega_{2b} = 1.000$<br>Foreground: $\omega_0 = 0.087$ , $\omega_1 = 1.000$ ,<br>$\omega_{2a} = 9.474$ , $\omega_{2b} = 9.474$   | 30.123 | 1 | 0.0000** | 46C (0.997); 47E (0.953); 52P (0.996);<br>56G (0.992); 63E (0.999); 95Q (0.982);<br>129Q (0.998); 191C (0.997); 215A (0.955);<br>216C (0.998); 245E (0.999); 250G (0.990);<br>277R (0.972); 289K (0.997); 290K (0.980) |
|                                                     | Null model | -48817.019 | $p_0 = 0.744$ , $p_1 = 0.117$ , $p_{2a} = 0.12$ , $p_{2b} = 0.019$<br>Background: $\omega_0 = 0.086$ , $\omega_1 = 1.000$ ,<br>$\omega_{2a} = 0.086$ , $\omega_{2b} = 1.000$<br>Foreground: $\omega_0 = 0.086$ , $\omega_1 = 1.000$ ,<br>$\omega_{2a} = 1.000$ , $\omega_{2b} = 1.000$       |        |   |          |                                                                                                                                                                                                                        |
| <i>Panicum virgatum</i><br>( <i>PvGGP-2</i> )       | Model A    | -48791.388 | $p_0 = 0.849$ , $p_1 = 0.136$ , $p_{2a} = 0.013$ ,<br>$p_{2b} = 0.002$<br>Background: $\omega_0 = 0.087$ , $\omega_1 = 1.000$ ,<br>$\omega_{2a} = 0.087$ , $\omega_{2b} = 1.000$<br>Foreground: $\omega_0 = 0.087$ , $\omega_1 = 1.000$ ,<br>$\omega_{2a} = 87.418$ , $\omega_{2b} = 87.418$ | 55.025 | 1 | 0.0000** | 51 (0.999); 6N (0.999); 7Q (1.000);<br>8- (1.000); 9- (1.000); 12- (1.000)                                                                                                                                             |
|                                                     | Null model | -48818.900 | $p_0 = 0.709$ , $p_1 = 0.113$ , $p_{2a} = 0.154$ ,<br>$p_{2b} = 0.025$<br>Background: $\omega_0 = 0.087$ , $\omega_1 = 1.000$ ,<br>$\omega_{2a} = 0.087$ , $\omega_{2b} = 1.000$<br>Foreground: $\omega_0 = 0.087$ , $\omega_1 = 1.000$ ,<br>$\omega_{2a} = 1.000$ , $\omega_{2b} = 1.000$   |        |   |          |                                                                                                                                                                                                                        |

|                                                         |            |            |                                                                                                                                                                                                                                                                             |        |   |          |                                                                                       |
|---------------------------------------------------------|------------|------------|-----------------------------------------------------------------------------------------------------------------------------------------------------------------------------------------------------------------------------------------------------------------------------|--------|---|----------|---------------------------------------------------------------------------------------|
| <i>Picea abies</i><br>( <i>PaGGP-3</i> )                | Model A    | -48799.663 | p0 = 0.855, p1 = 0.136, p2a = 0.008,<br>p2b = 0.001<br>Background: $\omega_0 = 0.087$ , $\omega_1 = 1.000$ ,<br>$\omega_{2a} = 0.087$ , $\omega_{2b} = 1.000$<br>Foreground: $\omega_0 = 0.087$ , $\omega_1 = 1.000$ ,<br>$\omega_{2a} = 969.357$ , $\omega_{2b} = 969.357$ | 46.735 | 1 | 0.0000** | 1T (1.000); 2V (0.993); 4S (1.000);<br>5I (0.999); 6N (1.000); 7Q (0.993)             |
|                                                         | Null model | -48823.030 | p0 = 0.476, p1 = 0.076, p2a = 0.387,<br>p2b = 0.062<br>Background: $\omega_0 = 0.087$ , $\omega_1 = 1.000$ ,<br>$\omega_{2a} = 0.087$ , $\omega_{2b} = 1.000$<br>Foreground: $\omega_0 = 0.087$ , $\omega_1 = 1.000$ ,<br>$\omega_{2a} = 1.000$ , $\omega_{2b} = 1.000$     |        |   |          |                                                                                       |
| <i>Selaginella moellendorffii</i><br>( <i>SmGGP-2</i> ) | Model A    | -48824.521 | p0 = 0.811, p1 = 0.130, p2a = 0.051,<br>p2b = 0.008<br>Background: $\omega_0 = 0.087$ , $\omega_1 = 1.000$ ,<br>$\omega_{2a} = 0.087$ , $\omega_{2b} = 1.000$<br>Foreground: $\omega_0 = 0.087$ , $\omega_1 = 1.000$ ,<br>$\omega_{2a} = 4.037$ , $\omega_{2b} = 4.037$     | 5.590  | 1 | 0.018*   | 109N (0.964); 112A (0.969); 113I (0.984);<br>151P (0.978); 179P (0.966); 297S (0.992) |
|                                                         | Null model | -48827.316 | p0 = 0.782, p1 = 0.125, p2a = 0.08, p2b<br>= 0.013<br>Background: $\omega_0 = 0.087$ , $\omega_1 = 1.000$ ,<br>$\omega_{2a} = 0.087$ , $\omega_{2b} = 1.000$<br>Foreground: $\omega_0 = 0.087$ , $\omega_1 = 1.000$ ,<br>$\omega_{2a} = 1.000$ , $\omega_{2b} = 1.000$      |        |   |          |                                                                                       |
| <i>Selaginella moellendorffii</i><br>( <i>SmGGP-3</i> ) | Model A    | -48814.674 | p0 = 0.758, p1 = 0.116, p2a = 0.109,<br>p2b = 0.017                                                                                                                                                                                                                         | 10.297 | 1 | 0.001*   | 8- (0.984); 9- (0.971); 34M (0.956);<br>82P (0.991); 112A (0.955); 138T (0.965);      |



|                                  |            |            |                                                                                                                                                                                                                                                                                              |        |   |          |                                                                                                                                                                         |
|----------------------------------|------------|------------|----------------------------------------------------------------------------------------------------------------------------------------------------------------------------------------------------------------------------------------------------------------------------------------------|--------|---|----------|-------------------------------------------------------------------------------------------------------------------------------------------------------------------------|
|                                  |            |            | Background: $\omega_0 = 0.087$ , $\omega_1 = 1.000$ ,<br>$\omega_{2a} = 0.087$ , $\omega_{2b} = 1.000$<br>Foreground: $\omega_0 = 0.087$ , $\omega_1 = 1.000$ ,<br>$\omega_{2a} = 3.798$ , $\omega_{2b} = 3.798$                                                                             |        |   |          | 150N (0.953); 190G (0.988); 217I (0.995);<br>222D (0.974); 231A (0.980); 245E (0.970);<br>250G (0.983); 253D (0.975); 290K (0.990);<br>299D (0.989); 300R (0.985)       |
|                                  | Null model | -48819.823 | $p_0 = 0.741$ , $p_1 = 0.116$ , $p_{2a} = 0.123$ ,<br>$p_{2b} = 0.019$<br>Background: $\omega_0 = 0.087$ , $\omega_1 = 1.000$ ,<br>$\omega_{2a} = 0.087$ , $\omega_{2b} = 1.000$<br>Foreground: $\omega_0 = 0.087$ , $\omega_1 = 1.000$ ,<br>$\omega_{2a} = 1.000$ , $\omega_{2b} = 1.000$   |        |   |          |                                                                                                                                                                         |
| <i>Volvox carteri</i><br>(VcGGP) | Model A    | -48804.773 | $p_0 = 0.755$ , $p_1 = 0.118$ , $p_{2a} = 0.109$ ,<br>$p_{2b} = 0.017$<br>Background: $\omega_0 = 0.087$ , $\omega_1 = 1.000$ ,<br>$\omega_{2a} = 0.087$ , $\omega_{2b} = 1.000$<br>Foreground: $\omega_0 = 0.087$ , $\omega_1 = 1.000$ ,<br>$\omega_{2a} = 16.335$ , $\omega_{2b} = 16.335$ | 32.725 | 1 | 0.0000** | 8- (0.999); 9- (0.961); 18A (0.965);<br>22L (0.992); 23Y (0.999); 47E (0.966);<br>148V (0.990); 184R (0.999); 190G (0.972);<br>202R (0.998); 251E (0.998); 303E (1.000) |
|                                  | Null model | -48821.135 | $p_0 = 0.745$ , $p_1 = 0.118$ , $p_{2a} = 0.119$ ,<br>$p_{2b} = 0.019$<br>Background: $\omega_0 = 0.087$ , $\omega_1 = 1.000$ ,<br>$\omega_{2a} = 0.087$ , $\omega_{2b} = 1.000$<br>Foreground: $\omega_0 = 0.087$ , $\omega_1 = 1.000$ ,<br>$\omega_{2a} = 1.000$ , $\omega_{2b} = 1.000$   |        |   |          |                                                                                                                                                                         |
| <i>Zea mays</i><br>(ZmGGP-1)     | Model A    | -48818.760 | $p_0 = 0.846$ , $p_1 = 0.135$ , $p_{2a} = 0.016$ ,<br>$p_{2b} = 0.003$<br>Background: $\omega_0 = 0.087$ , $\omega_1 = 1.000$ ,<br>$\omega_{2a} = 0.087$ , $\omega_{2b} = 1.000$                                                                                                             | 21.888 | 1 | 0.0000** | 25D (0.996); 26S (0.996); 27L (0.996);<br>28S (1.000); 29Q (0.996)                                                                                                      |

|  |            |            |                                                                                                                                                                                                                                                                                            |  |  |  |  |
|--|------------|------------|--------------------------------------------------------------------------------------------------------------------------------------------------------------------------------------------------------------------------------------------------------------------------------------------|--|--|--|--|
|  |            |            | Foreground: $\omega_0 = 0.087$ , $\omega_1 = 1.000$ ,<br>$\omega_{2a} = 999.000$ , $\omega_{2b} = 999.000$                                                                                                                                                                                 |  |  |  |  |
|  | Null model | -48829.704 | $p_0 = 0.449$ , $p_1 = 0.072$ , $p_{2a} = 0.414$ ,<br>$p_{2b} = 0.066$<br>Background: $\omega_0 = 0.087$ , $\omega_1 = 1.000$ ,<br>$\omega_{2a} = 0.087$ , $\omega_{2b} = 1.000$<br>Foreground: $\omega_0 = 0.087$ , $\omega_1 = 1.000$ ,<br>$\omega_{2a} = 1.000$ , $\omega_{2b} = 1.000$ |  |  |  |  |

<sup>a</sup> lnL: log-likelihood scores.

<sup>b</sup>  $-2\Delta\ln L$ : twice the log-likelihood difference of the models being compared.

<sup>c</sup> d.f.: degree of freedom.

\*  $p < 0.05$ ; \*\*  $p < 0.0003$  (Bonferroni correction for a significance level of 0.05 over 149 independent tests).

Text S1. Alignment of plant GGP protein sequences and the histidine triad (HIT) motif is marked using box.

|           | 10         | 20         | 30        | 40         | 50         | 60         | 70         | 80      | 90         | 100        | 110        | 120       |           |
|-----------|------------|------------|-----------|------------|------------|------------|------------|---------|------------|------------|------------|-----------|-----------|
| AcGGP     |            |            |           |            |            |            |            | MLK     |            |            |            |           |           |
| AcGGP-R-1 |            |            |           |            |            |            |            | MLK     |            |            |            |           |           |
| AcGGP-R-2 | M          |            |           |            |            |            | LNT        | ATQ-MLT |            |            |            |           |           |
| AdGGP     |            |            |           |            |            |            |            | MLK     |            |            |            |           |           |
| AeGGP     |            |            |           |            |            |            |            | MLK     |            |            |            |           |           |
| ArGGP     |            |            |           |            |            |            |            | MLK     |            |            |            |           |           |
| AmhGGP-1  |            |            |           |            |            |            |            | MLR     |            |            |            |           |           |
| AmhGGP-2  |            |            |           |            |            |            | MGI        | LEK-SLT |            |            |            |           |           |
| AncGGP-3  |            |            |           |            |            |            |            | MLSEA   |            |            |            |           |           |
| AncGGP-1  |            |            |           |            |            |            |            | MLT     |            |            |            |           |           |
| AncGGP-2  |            |            |           |            |            |            |            | MLT     |            |            |            |           |           |
| AqcGGP    |            |            |           |            |            |            |            | MLR     |            |            |            |           |           |
| AhGGP-1   |            |            |           |            |            |            |            | MLK     |            |            |            |           |           |
| AhGGP-2   |            |            |           |            |            |            |            | M-LLK   |            |            |            |           |           |
| AlGGP-1   |            |            |           |            |            |            |            | MLK     |            |            |            |           |           |
| AlGGP-2   |            |            |           |            |            |            |            | M-LLK   |            |            |            |           |           |
| AtGGP-1   |            |            |           |            |            |            |            | MLK     |            |            |            |           |           |
| AtGGP-2   |            |            |           |            |            |            |            | M-LLK   |            |            |            |           |           |
| BosGGP-1  |            |            |           |            |            |            |            | MLK     |            |            |            |           |           |
| BosGGP-2  |            |            |           |            |            |            |            | M-LLK   |            |            |            |           |           |
| BdGGP-1   |            |            |           |            |            |            |            | MEM-KLT |            |            |            |           |           |
| BdGGP-2   |            |            |           |            |            |            |            | MEV-KLT |            |            |            |           |           |
| BdGGP-3   |            |            |           |            |            |            |            |         |            |            |            |           |           |
| BsGGP-1   |            |            |           |            |            |            |            | MEM-KLT |            |            |            |           |           |
| BsGGP-2   |            |            |           |            |            |            |            | MEV-KLT |            |            |            |           |           |
| BsGGP-3   |            |            |           |            |            |            |            |         |            |            |            |           |           |
| BoGGP-1   |            |            |           |            |            |            |            | MLK     |            |            |            |           |           |
| BoGGP-2   |            |            |           |            |            |            |            | MLK     |            |            |            |           |           |
| BoGGP-3   |            |            |           |            |            |            |            | M-LLK   |            |            |            |           |           |
| BrGGP-1   |            |            |           |            |            |            |            | MLK     |            |            |            |           |           |
| BrGGP-2   |            |            |           |            |            |            |            | MLK     |            |            |            |           |           |
| BrGGP-3   |            |            |           |            |            |            |            | MLK     |            |            |            |           |           |
| BrGGP-4   |            |            |           |            |            |            |            | M-LLK   |            |            |            |           |           |
| CgGGP-1   |            |            |           |            |            |            |            | MLK     |            |            |            |           |           |
| CgGGP-2   |            |            |           |            |            |            |            | M-LLK   |            |            |            |           |           |
| CrGGP-1   |            |            |           |            |            |            |            | MLK     |            |            |            |           |           |
| CrGGP-2   |            |            |           |            |            |            |            | M-LLK   |            |            |            |           |           |
| ChrGGP    |            |            |           |            |            |            |            | MDSLQ-A | L          |            |            |           |           |
| CcGGP-1   |            |            |           |            |            |            |            | M-MLR   |            |            |            |           |           |
| CcGGP-2   |            |            |           |            |            |            |            | MLT     |            |            |            |           |           |
| CsGGP-1   |            |            |           |            |            |            |            | M-MLR   |            |            |            |           |           |
| CsGGP-2   |            |            |           |            |            |            |            | MLT     |            |            |            |           |           |
| CosGGP    |            |            |           |            |            |            |            | MYH     |            |            |            |           |           |
| CusGGP    |            |            |           |            |            |            |            | MLR     |            |            |            |           |           |
| DcGGP-1   |            |            |           |            |            |            |            | MEMLR   |            |            |            |           |           |
| DcGGP-2   |            |            |           |            |            |            |            | MLR     |            |            |            |           |           |
| DsGGP     | M          |            |           | L          | QQVTQQQQQL | QQQQQQQQQL | DGNVCNSS   | MSR     | SNSNHLT    |            |            |           |           |
| EgGGP-1   |            |            |           |            |            |            |            | M-MLK   |            |            |            |           |           |
| EgGGP-2   |            |            |           |            |            |            |            | M-MLK   |            |            |            |           |           |
| EgGGP-3   |            |            |           |            |            |            |            | MLT     |            |            |            |           |           |
| EgGGP-4   |            |            |           |            |            |            |            | MLT     |            |            |            |           |           |
| EgGGP-5   |            |            |           |            |            |            |            | MLT     |            |            |            |           |           |
| EsGGP-1   |            |            |           |            |            |            |            | MLS     |            |            |            |           |           |
| EsGGP-2   |            |            |           |            |            |            |            | M-LLK   |            |            |            |           |           |
| FvGGP-1   |            |            |           |            |            |            |            | M-MLK   |            |            |            |           |           |
| FvGGP-2   |            |            |           |            |            |            |            | M-MLK   |            |            |            |           |           |
| FvGGP-3   |            |            |           |            |            |            |            | M-MMK   |            |            |            |           |           |
| GmGGP-1   |            |            |           |            |            |            |            | M-MLK   |            |            |            |           |           |
| GmGGP-2   |            |            |           |            |            |            |            | M-MLR   |            |            |            |           |           |
| GmGGP-3   |            |            |           |            |            |            |            | MLS     |            |            |            |           |           |
| GmGGP-4   |            |            |           |            |            |            |            | MLS     |            |            |            |           |           |
| GnmGGP    |            |            |           |            |            |            |            | MLT     |            |            |            |           |           |
| GrGGP-1   |            |            |           |            |            |            |            | M-MLR   |            |            |            |           |           |
| GrGGP-2   |            |            |           |            |            |            |            | M-MLR   |            |            |            |           |           |
| GrGGP-3   |            |            |           |            |            |            |            | MM-QLS  |            |            |            |           |           |
| KfGGP-1   |            |            |           |            |            |            |            | MGE     | STM-MLK    |            |            |           |           |
| KfGGP-2   |            |            |           |            |            |            |            | MGE     | STM-MLK    |            |            |           |           |
| KlGGP-1   |            |            |           |            |            |            |            | MGE     | STM-MLK    |            |            |           |           |
| KlGGP-2   |            |            |           |            |            |            |            | MGE     | STM-MLK    |            |            |           |           |
| KlGGP-3   |            |            |           |            |            |            |            | MGE     | STM-MLK    |            |            |           |           |
| LuGGP     | MLVVTLGKVG | CEGGRRVVDI | TAIHGVSRL | LHVRKKEVIV | IQSNPSAHGG | RGALPSEGGS | PSDLLFLAGG | DKM-MLR |            |            |            |           |           |
| MdGGP     |            |            |           |            |            |            |            | M-MLR   |            |            |            |           |           |
| MeGGP-1   | M          |            |           |            |            |            |            | S       | DNF-MLR    |            |            |           |           |
| MeGGP-2   | M          |            |           |            |            |            |            | S       | DNL-MLR    |            |            |           |           |
| MeGGP-3   |            |            |           |            |            |            |            |         | M-LLT      |            |            |           |           |
| MpGGP     |            |            |           |            |            |            |            |         | MLT        |            |            |           |           |
| MtGGP-1   |            |            |           |            |            |            |            |         | M-MLK      |            |            |           |           |
| MtGGP-2   |            |            |           |            |            |            |            |         | MLS        |            |            |           |           |
| MpGGP     |            |            |           |            |            |            |            |         | MAT        |            |            |           |           |
| MsGGP     |            |            |           |            |            |            |            |         | M-SLT      |            |            |           |           |
| MgGGP-1   |            |            |           |            |            |            |            |         | M-MLK      |            |            |           |           |
| MgGGP-2   |            |            |           |            |            |            |            |         | M-MLK      |            |            |           |           |
| MaGGP-1   |            |            |           |            |            |            |            |         | MLT        |            |            |           |           |
| MaGGP-2   |            |            |           |            |            |            |            |         | MLS        |            |            |           |           |
| MaGGP-3   |            |            |           |            |            |            |            |         | MLT        |            |            |           |           |
| MaGGP-4   |            |            |           |            |            |            |            |         |            |            |            |           |           |
| OtGGP     |            |            |           |            |            |            |            |         | MEM-KLT    |            |            |           |           |
| OsGGP-1   |            |            |           |            |            |            |            |         | MEM-KLT    |            |            |           |           |
| OsGGP-2   |            |            |           |            |            |            |            |         | MPISPL     |            |            |           |           |
| OlgGGP    |            |            |           |            |            |            |            |         |            |            |            |           |           |
| PhGGP-1   |            |            |           |            |            |            |            |         | MEM-KLT    |            |            |           |           |
| PhGGP-2   |            |            |           |            |            |            |            |         |            |            |            |           |           |
| PvGGP-1   |            |            |           |            |            |            |            |         | MEM-KLT    |            |            |           |           |
| PvGGP-2   |            |            |           |            |            |            |            |         | MATCSLTRLT | VC         |            |           |           |
| PvGGP-3   |            |            |           |            |            |            |            |         |            |            |            |           |           |
| PhvGGP-1  |            |            |           |            |            |            |            |         | M-MLK      |            |            |           |           |
| PhvGGP-2  |            |            |           |            |            |            |            |         | MLS        |            |            |           |           |
| PpGGP-1   |            |            |           |            |            |            |            |         | MLT        |            |            |           |           |
| PpGGP-2   |            |            |           |            |            |            |            |         | MLT        |            |            |           |           |
| PpGGP-3   |            |            |           |            |            |            |            |         | MLT        |            |            |           |           |
| PaGGP-1   |            |            |           |            |            |            |            |         | MLT        |            |            |           |           |
| PaGGP-2   |            |            |           |            |            |            |            |         | MVTQKD     | HVDKTQTGSL | SLASPPGISA | FSAFPFRPH | DRRILRSRN |
| PaGGP-3   |            |            |           |            |            |            |            |         | MPLGR      |            |            |           |           |
| PsGGP-1   |            |            |           |            |            |            |            |         | MLT        |            |            |           |           |
| PsGGP-2   |            |            |           |            |            |            |            |         | MLT        |            |            |           |           |
| PsGGP-3   |            |            |           |            |            |            |            |         | MLT        |            |            |           |           |
| PtGGP-1   |            |            |           |            |            |            |            |         | MLT        |            |            |           |           |
| PtGGP-2   |            |            |           |            |            |            |            |         | MLT        |            |            |           |           |
| PtGGP-3   |            |            |           |            |            |            |            |         | MLT        |            |            |           |           |
| PtGGP-4   |            |            |           |            |            |            |            |         | MLT        |            |            |           |           |
| PtGGP-5   |            |            |           |            |            |            |            |         | MLT        |            |            |           |           |
| PotGGP-1  |            |            |           |            |            |            |            |         | M-MLR      |            |            |           |           |
| PotGGP-2  |            |            |           |            |            |            |            |         | M-MLR      |            |            |           |           |





|           |            |            |       |       |       |       |       |          |       |       |       |             |       |       |          |       |
|-----------|------------|------------|-------|-------|-------|-------|-------|----------|-------|-------|-------|-------------|-------|-------|----------|-------|
| CsGGP-2   | -----TVV   | SNYQD      | ----- | QE    | ETA   | ----- | ----- | SENS     | ----- | E     | ----- | AGCGNSC     | ---   | ---   | LGNC     | ----- |
| CosGGP    | -----SWL   | SGSSD      | ----- | EE    | GS    | ----- | ----- | -----    | ----- | ----- | ----- | -----       | ----- | ----- | -----    | ----- |
| CusGGP    | -----TVV   | SNYQE      | ----- | DE    | TEN   | ----- | ----- | VSR      | ----- | S     | ----- | TGCGRNC     | ---   | ---   | LNKCC    | ----- |
| DcGGP-1   | -----TIV   | SNYQK      | ----- | EE    | GEE   | ----- | ----- | GACR     | ----- | ----- | ----- | VGCGRNC     | ---   | ---   | LNTCC    | ----- |
| DcGGP-2   | -----TVV   | SNYQK      | ----- | ED    | GEE   | ----- | ----- | ASRQ     | ----- | T     | ----- | GGCGRNC     | ---   | ---   | LNKCC    | ----- |
| DsGGP     | -----TVV   | SMQL       | ----- | AQ    | DDS   | ----- | ----- | -----    | ----- | ----- | ----- | GGSGGNAPPS  | ---   | ---   | NPESISQC | ----- |
| EgGGP-1   | -----TVV   | SNYQK      | ----- | EE    | VEG   | ----- | ----- | G--R     | ----- | V     | ----- | GGCGRNC     | ---   | ---   | LNKCC    | ----- |
| EgGGP-2   | -----TVV   | SNYQK      | ----- | EE    | AEE   | ----- | ----- | GARR     | ----- | G     | ----- | GGCGRNC     | ---   | ---   | LNKCC    | ----- |
| EgGGP-3   | -----TVV   | SNYQE      | ----- | EG    | ----- | ----- | ----- | GE       | ----- | A     | ----- | KGCGRNC     | ---   | ---   | LGKCC    | ----- |
| EgGGP-4   | -----TVV   | SNYQE      | ----- | GG    | EKD-N | ----- | ----- | AAVAVEGE | ----- | T     | ----- | KGCGRNC     | ---   | ---   | LGKCC    | ----- |
| EgGGP-5   | -----TVV   | SNYQE      | ----- | EG    | GEKDN | ----- | ----- | AAVAVEGE | ----- | A     | ----- | KGCGRNC     | ---   | ---   | LGKCC    | ----- |
| EsGGP-1   | -----TVV   | SNYQK      | ----- | DE    | AAD   | ----- | ----- | E        | ----- | S     | ----- | VGCGRNC     | ---   | ---   | LGACC    | ----- |
| EsGGP-2   | -----TVV   | SNYQK      | ----- | DE    | TAE   | ----- | ----- | E        | ----- | G     | ----- | GGCGRNC     | ---   | ---   | LSKCC    | ----- |
| FvGGP-1   | -----TVV   | SNYQK      | ----- | DE    | ADE   | ----- | ----- | G-RR     | ----- | A     | ----- | GGCGRNC     | ---   | ---   | LNKCC    | ----- |
| FvGGP-2   | -----TVV   | SNYQK      | ----- | DE    | ADE   | ----- | ----- | G-RR     | ----- | A     | ----- | GGCGRNC     | ---   | ---   | LNKCC    | ----- |
| FvGGP-3   | -----TVV   | SNYQN      | ----- | DE    | ADE   | ----- | ----- | G-RR     | ----- | V     | ----- | GGCGRNC     | ---   | ---   | LNKCC    | ----- |
| GmGGP-1   | -----TVV   | SNFQK      | ----- | DD    | AAD   | ----- | ----- | SPRP     | ----- | V     | ----- | GGCGRNC     | ---   | ---   | LKACC    | ----- |
| GmGGP-2   | -----TVV   | SNYQK      | ----- | DD    | AAD   | ----- | ----- | SPRP     | ----- | V     | ----- | GGCGRNC     | ---   | ---   | LKACC    | ----- |
| GmGGP-3   | -----TVV   | SNYQK      | ----- | EE    | TGE   | ----- | ----- | AA       | ----- | A     | ----- | GGCGRNC     | ---   | ---   | LKSCC    | ----- |
| GmGGP-4   | -----TVV   | SNYQK      | ----- | EE    | TGE   | ----- | ----- | AA-A     | ----- | A     | ----- | GGCGRNC     | ---   | ---   | LKSCC    | ----- |
| GnmGGP    | -----TIV   | SMYHD      | ----- | ----- | ----- | ----- | ----- | GSEA     | ----- | A     | ----- | AGCGRNC     | ---   | ---   | LGQCC    | ----- |
| GrGGP-1   | -----TVV   | SNYQK      | ----- | DE    | ADD   | ----- | ----- | TARR     | ----- | T     | ----- | AGCGRNC     | ---   | ---   | LKSCC    | ----- |
| GrGGP-2   | -----TVV   | SNYQK      | ----- | DE    | TEE   | ----- | ----- | TARR     | ----- | S     | ----- | SGCGKNC     | ---   | ---   | LRSCC    | ----- |
| GrGGP-3   | -----TVV   | SNYQK      | ----- | DE    | AEE   | ----- | ----- | TARR     | ----- | S     | ----- | GGCGKNC     | ---   | ---   | LRSCC    | ----- |
| KfGGP-1   | -----TVV   | SNYQK      | ----- | DE    | ADE   | ----- | ----- | P        | ----- | ----- | ----- | KGCGRNC     | ---   | ---   | LKQCC    | ----- |
| KfGGP-2   | -----TVL   | SNYQK      | ----- | DE    | ADE   | ----- | ----- | P        | ----- | ----- | ----- | KGCGRQC     | ---   | ---   | LKECC    | ----- |
| KlGGP-1   | -----TVV   | SNYQK      | ----- | DE    | ADE   | ----- | ----- | P        | ----- | ----- | ----- | KGCGRNC     | ---   | ---   | LKQCC    | ----- |
| KlGGP-2   | -----TVL   | SNYQK      | ----- | DE    | ADE   | ----- | ----- | P        | ----- | ----- | ----- | KGCGRQC     | ---   | ---   | LKECC    | ----- |
| KlGGP-3   | -----TVL   | SNYQK      | ----- | DE    | ADE   | ----- | ----- | P        | ----- | ----- | ----- | KGCGRQC     | ---   | ---   | LKECC    | ----- |
| LuGGP     | -----TVV   | SNYQK      | ----- | EE    | TED   | ----- | ----- | A        | ----- | G     | ----- | GGCGRNC     | ---   | ---   | LQNC     | ----- |
| MdGGP     | -----TVV   | SNYQK      | ----- | DE    | AEE   | ----- | ----- | GARR     | ----- | V     | ----- | EGCGRNC     | ---   | ---   | LNQCC    | ----- |
| MeGGP-1   | -----TLV   | SNFQK      | ----- | E     | AEE   | ----- | ----- | GASR     | ----- | S     | ----- | GGCGRNC     | ---   | ---   | LKQCC    | ----- |
| MeGGP-2   | -----TVV   | SNFQK      | ----- | EE    | AEE   | ----- | ----- | GARR     | ----- | S     | ----- | EGCGRNC     | ---   | ---   | LRKCC    | ----- |
| MeGGP-3   | -----TVV   | SNYQE      | ----- | ES    | SE    | ----- | ----- | TS       | ----- | F     | ----- | EGCGRHC     | ---   | ---   | LGKCC    | ----- |
| MpGGP     | -----TVV   | SINQV      | ----- | SG    | AAD   | ----- | ----- | SSS      | ----- | ----- | ----- | -----       | ----- | ----- | -----    | ----- |
| MtGGP-1   | -----TVV   | SNYQK      | ----- | EE    | VGE   | ----- | ----- | AAPRT    | ----- | V     | ----- | GGCGRNC     | ---   | ---   | LKSCC    | ----- |
| MtGGP-2   | -----TVV   | SNYQK      | ----- | DE    | DAP   | ----- | ----- | -----    | ----- | V     | ----- | NGCGRNC     | ---   | ---   | LKSCC    | ----- |
| MpGGP     | -----TMI   | SMHQM      | ----- | DD    | EDD   | ----- | ----- | PK       | ----- | ----- | ----- | -----       | ---   | ---   | VARVV    | ----- |
| MsGGP     | -----TVL   | SIHQM      | ----- | DE    | EED   | ----- | ----- | PKF      | ----- | ----- | ---   | ---         | ---   | ---   | VRRC     | ----- |
| MgGGP-1   | -----TVV   | SNYQK      | ----- | DE    | AEE   | ----- | ----- | G        | ----- | G     | ----- | AGCGRNC     | ---   | ---   | LRSCC    | ----- |
| MgGGP-2   | -----TVV   | SNYQK      | ----- | DE    | AEE   | ----- | ----- | GVRP     | ----- | V     | ----- | TGCGRNC     | ---   | ---   | FRSCC    | ----- |
| MaGGP-1   | -----TVL   | SNYQE      | ----- | DS    | ----- | ----- | ----- | GE       | ----- | S     | ----- | RGCGRNC     | ---   | ---   | LGKCC    | ----- |
| MaGGP-2   | -----TVL   | SNYQE      | ----- | EN    | ----- | ----- | ----- | AGE      | ----- | P     | ----- | LGCGRSC     | ---   | ---   | LGKCC    | ----- |
| MaGGP-3   | -----TVL   | SNYQE      | ----- | DS    | ----- | ----- | ----- | GE       | ----- | P     | ----- | RGCDRNC     | ---   | ---   | LSKCC    | ----- |
| MaGGP-4   | -----M     | SVYQP      | ----- | TQ    | GQH   | ----- | ----- | G        | ----- | E     | ----- | EKSGRSC     | ---   | ---   | LLQVH    | ----- |
| OtGGP     | -----TVV   | SNYQE      | ----- | DS    | AAA   | ----- | ----- | A        | ----- | A     | ----- | GGCGRNC     | ---   | ---   | LGDC     | ----- |
| OsGGP-1   | -----TVV   | SNYQE      | ----- | DA    | AAT   | ----- | ----- | AGERP    | ----- | R     | ----- | AGCGRDC     | ---   | ---   | LGDC     | ----- |
| OsGGP-2   | -----AAF   | GA         | ----- | ----- | ----- | ----- | ----- | RP       | ----- | ARRR  | ----- | -----       | ----- | ----- | -----    | ----- |
| OlGGP     | -----      | -----      | ----- | ----- | ----- | ----- | ----- | -----    | ----- | ----- | ----- | -----       | ----- | ----- | -----    | ----- |
| PhGGP-1   | -----TVV   | SNYQD      | ----- | DA    | ----- | ----- | ----- | DKP      | ----- | R     | ----- | AGCGRNC     | ---   | ---   | LGHC     | ----- |
| PhGGP-2   | -----      | -----      | ----- | ----- | ----- | ----- | ----- | -----    | ----- | ----- | ----- | -----       | ----- | ----- | -----    | ----- |
| PvGGP-1   | -----TVV   | SNYQE      | ----- | DA    | ----- | ----- | ----- | DKP      | ----- | R     | ----- | AGCGRNC     | ---   | ---   | LGHC     | ----- |
| PvGGP-2   | LEPGSRETVD | SGVST      | ----- | ---   | ---   | ---   | ---   | ---      | ---   | ---   | ---   | ---         | ---   | ---   | ---      | ---   |
| PvGGP-3   | -----      | ---        | ---   | ---   | ---   | ---   | ---   | ---      | ---   | ---   | ---   | ---         | ---   | ---   | ---      | ---   |
| PhvGGP-1  | -----TVV   | SNYQK      | ----- | DG    | AAD   | ----- | ----- | TSRP     | ----- | V     | ----- | GGCGRNC     | ---   | ---   | LKACC    | ----- |
| PhvGGP-2  | -----TVV   | SNYQK      | ----- | EG    | SDE   | ----- | ----- | SP       | ----- | A     | ----- | EGCGRNC     | ---   | ---   | LKSCC    | ----- |
| PpGGP-1   | -----TVV   | SMHQ       | ----- | LE    | ----- | ----- | ----- | Q        | ----- | V     | ----- | PGCGRDC     | ---   | ---   | LGTC     | ----- |
| PpGGP-2   | -----TLV   | SINQQ      | ----- | LD    | ----- | ----- | ----- | Q        | ----- | A     | ----- | PGCGRDC     | ---   | ---   | LNKCC    | ----- |
| PpGGP-3   | -----TVV   | SMQQ       | ----- | LD    | ----- | ----- | ----- | Q        | ----- | G     | ----- | SGCGRDC     | ---   | ---   | LNKCC    | ----- |
| PaGGP-1   | -----TIL   | SNYQE      | ----- | GSE   | ----- | ----- | ----- | GSE      | ----- | G     | ----- | LGCGRNC     | ---   | ---   | LGQCC    | ----- |
| PaGGP-2   | -----TVL   | SNYQE      | ----- | GSE   | ----- | ----- | ----- | GSE      | ----- | G     | ----- | LGCGRSC     | ---   | ---   | LGQCC    | ----- |
| PaGGP-3   | -----FLL   | STGEE      | ----- | GSE   | ----- | ----- | ----- | GSE      | ----- | G     | ----- | LGCGRNC     | ---   | ---   | LGQCC    | ----- |
| PsGGP-1   | -----TIL   | SNYQE      | ----- | GSE   | ----- | ----- | ----- | GSE      | ----- | G     | ----- | LGCGRNC     | ---   | ---   | LGQCC    | ----- |
| PsGGP-2   | -----TIV   | SNYQE      | ----- | GSE   | ----- | ----- | ----- | GSE      | ----- | G     | ----- | LGCGRNC     | ---   | ---   | LGQCC    | ----- |
| PsGGP-3   | -----TIL   | SNYQE      | ----- | GSE   | ----- | ----- | ----- | GSE      | ----- | G     | ----- | LGCGRNC     | ---   | ---   | LGQCC    | ----- |
| PtGGP-1   | -----TIL   | SNYQE      | ----- | GSK   | ----- | ----- | ----- | GSK      | ----- | G     | ----- | LGCGRNC     | ---   | ---   | LGQCC    | ----- |
| PtGGP-2   | -----TIL   | SNYQE      | ----- | GSE   | ----- | ----- | ----- | GSE      | ----- | G     | ----- | LGCGRNC     | ---   | ---   | LGQCC    | ----- |
| PtGGP-3   | -----TIL   | SNYQE      | ----- | GSE   | ----- | ----- | ----- | GSE      | ----- | G     | ----- | FGCGRNC     | ---   | ---   | LGQCC    | ----- |
| PtGGP-4   | -----TIV   | SNYQE      | ----- | GSE   | ----- | ----- | ----- | GSE      | ----- | G     | ----- | VGCGRNC     | ---   | ---   | LGQCC    | ----- |
| PtGGP-5   | -----TTL   | SNYQE      | ----- | GSE   | ----- | ----- | ----- | GSE      | ----- | G     | ----- | LGCGRNC     | ---   | ---   | LGQCC    | ----- |
| PotGGP-1  | -----TVV   | SNYQK      | ----- | ED    | NE    | ----- | ----- | GSRR     | ----- | G     | ----- | GGCGRNC     | ---   | ---   | LQNC     | ----- |
| PotGGP-2  | -----TVV   | SNYQK      | ----- | EE    | GEE   | ----- | ----- | GSRR     | ----- | G     | ----- | GGCGRNC     | ---   | ---   | LNKCC    | ----- |
| PotGGP-3  | -----TVV   | SNYQE      | ----- | EN    | SE    | ----- | ----- | KG       | ----- | F     | ----- | EGCGRNC     | ---   | ---   | LGKCC    | ----- |
| PrpGGP    | -----TVV   | SNYQK      | ----- | DE    | AEE   | ----- | ----- | GARR     | ----- | V     | ----- | GGCGRNC     | ---   | ---   | LNQCC    | ----- |
| RcGGP-1   | -----TVV   | SNFQK      | ----- | DE    | AED   | ----- | ----- | GGKK     | ----- | S     | ----- | GGCGRNC     | ---   | ---   | LQKCC    | ----- |
| RcGGP-2   | -----      | -----      | ----- | ----- | ----- | ----- | ----- | -----    | ----- | ----- | ----- | -----       | ----- | ----- | -----    | ----- |
| RcGGP-3   | -----TVV   | SNYQE      | ----- | DD    | SSD   | ----- | ----- | TS       | ----- | F     | ----- | EGCGRDC     | ---   | ---   | LGNC     | ----- |
| SpGGP-1   | -----TVV   | SNYQK      | ----- | EE    | GEE   | ----- | ----- | GSRR     | ----- | G     | ----- | GGCGRNC     | ---   | ---   | LRNCC    | ----- |
| SpGGP-2   | -----TVV   | SNYQK      | ----- | ED    | GEE   | ----- | ----- | GSRR     | ----- | G     | ----- | GGCGRNC     | ---   | ---   | LNKCC    | ----- |
| SpGGP-3   | -----TVV   | SNYQE      | ----- | NS    | E     | ----- | ----- | KG       | ----- | F     | ----- | EGCGRNC     | ---   | ---   | LGKCC    | ----- |
| SmGGP-1   | -----TIV   | SNYQE      | ----- | ----- | ----- | ----- | ----- | SLES     | ----- | K     | ----- | ICCGKNC     | ---   | ---   | LGSCC    | ----- |
| SmGGP-2   | -----AIV   | SNDRS      | ----- | ----- | ----- | ----- | ----- | ET       | ----- | N     | ----- | HGCGRNC     | ---   | ---   | LGPC     | ----- |
| SmGGP-3   | -----TVV   | SVNQD      | ----- | ----- | ----- | ----- | ----- | -----    | ----- | C     | ----- | GSVSRDC     | ---   | ---   | LQSCF    | ----- |
| SiGGP-1   | -----TVV   | SNYQE      | ----- | DA    | ----- | ----- | ----- | DKP      | ----- | R     | ----- | AGCGRNC     | ---   | ---   | LGDC     | ----- |
| SiGGP-2   | -----APA   | AS         | ----- | ----- | ----- | ----- | ----- | DKP      | ----- | ----- | ----- | -----       | ----- | ----- | -----    | ----- |
| SvGGP-1   | -----TVV   | SNYQE      | ----- | DA    | ----- | ----- | ----- | DKP      | ----- | R     | ----- | AGCGRNC     | ---   | ---   | LGDC     | ----- |
| SvGGP-2   | -----APA   | AS         | ----- | ----- | ----- | ----- | ----- | DKP      | ----- | ----- | ----- | -----       | ----- | ----- | -----    | ----- |
| SlGGP-1   | -----TLV   | SNFQK      | ----- | DE    | ADE   | ----- | ----- | IAAR     | ----- | G     | ----- | AGCGRNC     | ---   | ---   | LRNCC    | ----- |
| SlGGP-2   | -----TLV   | SNYQE      | ----- | DV    | LEG   | ----- | ----- | N        | ----- | V     | ----- | MCGCRKC     | ---   | ---   | LGKCC    | ----- |
| StGGP-1   | -----TLV   | SNFQK      | ----- | DE    | ADE   | ----- | ----- | IGAR     | ----- | G     | ----- | AGCGRNC     | ---   | ---   | LRNCC    | ----- |
| StGGP-2   | -----TLV   | SNYQE      | ----- | DV    | LEG   | ----- | ----- | N        | ----- | V     | ----- | MCGCRKC     | ---   | ---   | LGKCC    | ----- |
| SbGGP-1   | -----TVV   | SNYQD      | ----- | DA    | ----- | ----- | ----- | DKP      | ----- | R     | ----- | AGCGRNC     | ---   | ---   | LGDC     | ----- |
| SbGGP-2   | -----APT   | AS         | ----- | ----- | ----- | ----- | ----- | DKP      | ----- | ----- | ----- | -----       | ----- | ----- | -----    | ----- |
| SfGGP-1   | -----TLV   | SINQE      | ----- | LE    | ----- | ----- | ----- | Q        | ----- | A     | ----- | AGCGKDC     | ---   | ---   | LGSC     | ----- |
| SfGGP-2   | -----TLV   | SFNQE      | ----- | LE    | ----- | ----- | ----- | Q        | ----- | A     | ----- | TCCGRDC     | ---   | ---   | LGSC     | ----- |
| SppGGP-1  | -----TVV   | SNFQE      | ----- | ---   | ---   | ---   | ---   | ---      | ---   | S     | ----- | LGCGRSC     | ---   | ---   | LGKCC    | ----- |
| SppGGP-2  | -----TVV   | SNFQE      | ----- | ---   | ---   | ---   | ---   | ---      | ---   | A     | ----- | LGCGRNC     | ---   | ---   | LGKCC    | ----- |
| TcGGP-1   | -----TVL   | SNYQK      | ----- | DE    | AEE   | ----- | ----- | TARR     | ----- | S     | ----- | GGCGKNC     | ---   | ---   | LRSCC    | ----- |
| TcGGP-2   | -----TVL   | SNYQE      | ----- | DA    | YEK   | ----- | ----- | Q        | ----- | E     | ----- | VGCGRNC     | ---   | ---   | LNKCC    | ----- |
| TpGGP     | -----TVV   | SNYQK      | ----- | EE    | VGD   | ----- | ----- | APRT     | ----- | V     | ----- | GGCGRNC     | ---   | ---   | LKACC    | ----- |
| VvGGP-1   | -----TVV   | SNYQK      | ----- | ED    | SDD   | ----- | ----- | GARQ     | ----- | V     | ----- | GGCGRNC     | ---   | ---   | LKQCC    | ----- |
| VvGGP-2   | -----TVV   | SNYQE      | ----- | EA    | SE    | ----- | ----- | -----    | ----- | S     | ----- | LGCGRNC     | ---   | ---   | LGHC     | ----- |
| VcGGP     | S-ASSDSTVA | SCLDAYLPIY | IF    | ----- | ---   | ---   | ---   | ---      | ---   | S---  | ---   | ---         | ---   | ---   | ---      | ---   |
| ZmGGP-E-1 | -----TVV   | SNYQE      | ----- | DA    | ----- | ----- | ----- | DKP      | ----- | R     | ----- | AGCGRNC     | ---   | ---   | LGDC     | ----- |
| ZmGGP-E-2 | -----AS    | PPTAA      | SRADE | ---   | ---   | ---   | ---   | ---      | ---   | T     | ----- | PILGRHCRFLF | ---   | ---   | LGKAL    | ----- |
| ZmGGP-1   | -----TVV   | SNYQE      | ----- | DA    | ----- | ----- | ----- | DKP      | ----- | R     | ----- | AGCGRNC     | ---   | ---   | LGDC     | ----- |
| ZmGGP-2   | -----AS    | PPTAA      |       |       |       |       |       |          |       |       |       |             |       |       |          |       |







|           |               |            |           |             |              |            |            |            |           |
|-----------|---------------|------------|-----------|-------------|--------------|------------|------------|------------|-----------|
| MaGGP-4   | ---GCSL---    | Q          | ---EK-IEA | QSTFLDRL--- | ---LKEWEDR   | KVRGLFHHDV | NAYETKLLSG | DYGFILQLIE | GRDLKKRPT |
| OtGGP     | ---SS---      | Q          | ---AD-AAQ | TKPLVNL---  | ---LTEWENR   | LARGLFRYDV | TACETKVI   | NLGFVAQLNE | GRHLKKRPT |
| OsGGP-1   | ---SCSLRKE--- | E          | ---ED-ASN | DEFFVNL---  | ---LGLWEDR   | MARGLFRYDV | TACETKVI   | NLGFVAQLNE | GRHLKKRPT |
| OlGGP     | ---PS---      | Q          | ---EN-GTN | LSPFVRKL--- | ---FKEWDDR   | KARGLFHDDI | SSCETKVL   | EHNFVATLIE | GRDQKKRPT |
| PhGGP-1   | ---SCSLGM---  | E          | ---DD-SLN | LSRFLDKL--- | ---ISAWEDR   | FAGGLFRYDV | TAVSTKVID  | KKKYVAQFNI | GRATNKRPT |
| PvGGP-1   | ---PA---      | Q          | ---ED-AAS | TKSLVNL---  | ---LTEWEDR   | MARGLFRYDV | TACETKVI   | NLGFVAQLNE | GRHLKKRPT |
| PvGGP-2   | ---PA---      | Q          | ---ED-AAS | TKSLVNL---  | ---LAEWEDR   | MARGLFRYDV | TACETKVI   | NLGFVAQLNE | GRHLKKRPT |
| PvGGP-3   | ---SCSPGM---  | E          | ---DD-SLN | SSRFLDKL--- | ---FREWEDR   | KARGLFHDDI | SSCETK---  | ---        | ---       |
| PhvGGP-1  | ---D-LALQ---  | C          | ---CG-EPP | VAFLLDSL--- | ---LGEWEDR   | MQRGLFRYDV | TACETKVI   | YGFVAQLNE  | GRHLKKRPT |
| PhvGGP-2  | ---L-PLLG---  | C          | ---KE-HYP | VAFLLDSL--- | ---LGEWEDR   | MQRGLFRYDV | TACETKVI   | YGFVAQLNE  | GRHLKKRPT |
| PpGGP-1   | ---R-AHTG---  | S          | ---VS-PQE | NYFLDELL--- | ---LAQWEDR   | MARGLFRYDV | TACETKML   | DCGFIAQLNE | GRHLQKRPT |
| PpGGP-2   | ---G-VHTN---  | NDDH-CIPGG | ---VS-PQE | NYFLDELL--- | ---LAQWEDR   | MARGLFRYDV | TACETKML   | DCGFIAQLNE | GRHLQKRPT |
| PpGGP-3   | ---S-VHDI---  | DESH-CVPPD | ---NP-PQE | NYFLDE-L--- | ---LAQWEDR   | MARGLFRYDV | TACETKML   | YGFIAQLNE  | GRHSQKRPT |
| PaGGP-1   | ---YADK---    | D          | ---AE-VAN | IPFLDSVL--- | ---LGEWEDR   | MQRGLFRYDV | TTCETKVI   | NYGFIAQLNE | GRHLKKRPT |
| PaGGP-2   | ---HAVK---    | D          | ---AK-VED | ITLLDTVL--- | ---LQWEDR    | MQRGLFRYDV | TTCETKVI   | NYGFIAQLNE | GRHLKKRPT |
| PaGGP-3   | ---HVDN---    | N          | ---VK-LAD | IPFLDSVL--- | ---LGLWEER   | MQRGLFRYDV | TTCETKVI   | NYGFIAQLNE | GRHLKKRPT |
| PsGGP-1   | ---YADK---    | D          | ---AE-VAN | IPFLDSVL--- | ---LGEWEDR   | MQRGLFRYDV | TTCETKVI   | NYGFIAQLNE | GRHLKKRPT |
| PsGGP-2   | ---HVDK---    | D          | ---VE-MAD | TPFLDTLL--- | ---LQWEDR    | MQRGLFRYDV | TTCETKVI   | NYGFIAQLNE | GRHLKKRPT |
| PsGGP-3   | ---HVDN---    | D          | ---VK-LAD | IPFLDSVL--- | ---LGLWEER   | MQRGLFRYDV | TTCETKVI   | NYGFIAQLNE | GRHLKKRPT |
| PtGGP-1   | ---DADK---    | D          | ---AE-VAH | ISFLDSVL--- | ---LGEWEDR   | MQRGLFRYDV | TTCETKVI   | NYGFIAQLNE | GRHLKKRPT |
| PtGGP-2   | ---HVDN---    | D          | ---VK-LTD | VPFLDSL---  | ---LGLWEER   | MQRGLFRYDV | TTCETKVI   | NYGFIAQLNE | GRHLKKRPT |
| PtGGP-3   | ---DAVK---    | D          | ---SK-VED | ITLLDAVL--- | ---VQWEDR    | MQRGLFRYDV | TTCETKVI   | YGFIAQLNE  | GRHLKKRPT |
| PtGGP-4   | ---HFDK---    | D          | ---VE-MAV | TPFLDSL---  | ---LQWEDR    | MQRGLFRYDV | TTCETKVI   | NYGFIAQLNE | GRHLKKRPT |
| PtGGP-5   | ---HVDN---    | D          | ---VK-LTD | VPFLDSL---  | ---LGLWEER   | MQRGLFRYDV | TTCETKVI   | NYGFIAQLNE | GRHLKKRPT |
| PotGGP-1  | ---VG-VFEY--- | D          | ---KG-EPP | VAFLLDSL--- | ---LGEWEDR   | VQRGLFRYDV | TACETKVI   | QHGFAQLNE  | GRHLKKRPT |
| PotGGP-2  | ---D-VFEH---  | D          | ---KS-EPP | VAFLLDSL--- | ---LGEWEDR   | MQRGLFRYDV | TTCETKVI   | YGFIAQLNE  | GRHLKKRPT |
| PotGGP-3  | ---S-VEKS---  | S          | ---EE-QPH | MCFLLHLL--- | ---LQWEDR    | MSRGLFRYDV | TACDTKII   | YGFIAQLNE  | GRHLKKRPT |
| PrpGGP    | ---E-LPGS---  | E          | ---KR-EPP | VDFLLDSL--- | ---LGEWEDR   | MQRGLFRYDV | TACETKVI   | YGFIAQLNE  | GRHLKKRPT |
| RcGGP-1   | ---E-VIEH---  | E          | ---NT-EPP | VAFLLDSL--- | ---LGEWEDR   | VQRGLFRYDV | TACETKVI   | YGFIAQLNE  | GRHLKKRPT |
| RcGGP-2   | ---E-EIEH---  | E          | ---NI-EPP | VAFLLDSL--- | ---LGEWEDR   | MQRGLFRYDV | TACETKVI   | YGFIAQLNE  | GRHLKKRPT |
| RcGGP-3   | ---G-EMKF---  | S          | ---KE-QPP | ICFLHLL---  | ---LQWEDR    | MCRGLFRYDV | TACETRIIP  | YGFIAQLNE  | GRHLKKRPT |
| SpGGP-1   | ---VPEH---    | G          | ---KS-EPP | VAFLLDSL--- | ---LGEWEDR   | MQRGLFRYDV | TTCETKVI   | SHGFAQLNE  | GRHLKKRPT |
| SpGGP-2   | ---VG-VSED--- | D          | ---KG-BTT | VAFLLDSL--- | ---LGEWEDR   | MQRGLFRYDV | TACETKVI   | YGFIAQLNE  | GRHLKKRPT |
| SpGGP-3   | ---S-VEKS---  | S          | ---ED-QPQ | ICFLHLL---  | ---LQWEDR    | MSRGLFRYDV | TACDTKII   | YGFIAQLNE  | GRHLKKRPT |
| SmGGP-1   | ---GEIQ---    | S          | ---KE-LGQ | NSFLDSAI--- | ---LQWADK    | QABGLFRYDV | TACATKVI   | YGFIAQLNE  | GRHLKKRPT |
| SmGGP-2   | ---           | ---        | ---TK-GET | IDFLHSFI--- | ---LAPWMEK   | QKQGLFRYDV | TSCETKIL   | DCGFIAQLNE | GRHSKKRPT |
| SmGGP-3   | ---EVPS---    | S          | ---PP-TIE | RSFLGTL---  | ---LSKWEER   | ASQGLFRYDV | TACESRVL   | NYGFIAQLNE | GRHLKKRPT |
| SiGGP-1   | ---PS---      | Q          | ---ED-AAS | TKSLVNL---  | ---LTEWEDR   | MARGLFRYDV | TACETKVI   | NLGFVAQLNE | GRHLKKRPT |
| SiGGP-2   | ---GCSLGM---  | E          | ---ND-SLS | LSPFLNKL--- | ---FREWEDR   | KARGLFHDDI | SSCETKVL   | QHNFVATLIE | GRDQKKRPT |
| SvGGP-1   | ---PS---      | Q          | ---ED-AAS | TKSLVNL---  | ---LTEWEDR   | MARGLFRYDV | TACETKVI   | NLGFVAQLNE | GRHLKKRPT |
| SvGGP-2   | ---GCSLGM---  | E          | ---ND-SLS | LSPFLNKL--- | ---FREWEDR   | KARGLFHDDI | SSCETKVL   | QHNFVATLIE | GRDQKKRPT |
| SlGGP-1   | ---SVAD---    | E          | ---TK-ESP | IDFLLESV--- | ---LGEWEDR   | QKGLFRYDV  | TACETKVI   | YGFVAQLNE  | GRHLKKRPT |
| SlGGP-2   | ---D-VQTL---  | P          | ---EE-ECQ | MSFLMDLL--- | ---LGLWEER   | MSQGLFRYDV | TTCETKVI   | RCGFIAQLNE | GRHLKKRPT |
| StGGP-1   | ---S-VAAD---  | E          | ---TK-ESP | IDFLLESV--- | ---LGEWEDR   | QKGLFRYDV  | TACETKVI   | YGFVAQLNE  | GRHLKKRPT |
| StGGP-2   | ---D-IQTL---  | P          | ---EE-ECQ | MSFLMDLL--- | ---LGLWEER   | MSQGLFRYDV | TTCETKVI   | RCGFIAQLNE | GRHLKKRPT |
| SbGGP-1   | ---RS---      | Q          | ---EG-AAS | TKLLVDIL--- | ---LSEWEDR   | MARGLFRYDV | TACETKVI   | NLGFVAQLNE | GRHLKKRPT |
| SbGGP-2   | ---T---       | E          | ---HE-GSN | LSPFLHRL--- | ---FNEWDDR   | KTRGLFHDDI | SSCETKVL   | EHNFVATLIE | GRDQKKRPT |
| SfGGP-1   | ---CS-TNGG--- | GDGHDTLNNG | ---DS-DGD | NGFLDSL---  | ---LAQWEDR   | MDKGLFRYDV | TACETMVL   | EHGFIAQLNE | GRHSKKRPT |
| SfGGP-2   | ---N-AYSN---  | GDGH-KVANG | ---NS-EAA | NGFLDSL---  | ---LAQWEDR   | MARGLFRYDV | TACETMVL   | EHGFIAQLNE | GRHSKKRPT |
| SppGGP-1  | ---KS-LPAA--- | P          | ---DE-DSP | VDFLNLV---  | ---LQWEDR    | MSRGLFRYDV | TACETKVI   | YGFIAQLNE  | GRHLKKRPT |
| SppGGP-2  | ---KK-ALSI--- | P          | ---DE-DPS | IDFLNTLV--- | ---LQWEDR    | LSKGLFRYDV | TACESKVI   | YGFIAQLNE  | GRHLKKRPT |
| TcGGP-1   | ---G-VRGN---  | E          | ---NK-EPP | VAFLLDSL--- | ---LGEWEDR   | MQRGLFRYDV | TACETKVI   | YGFIAQLNE  | GRHLKKRPT |
| TcGGP-2   | ---G-ELYP---  | S          | ---EE-QPQ | PSFL-NLL--- | ---LEQWEDR   | MRRGLFRYDV | TNCKTKII   | YGFIAQLNE  | GRHLKKRPT |
| TpGGP     | ---L-AIDE---  | E          | ---KE-BLP | LAFLLDSL--- | ---LGEWEDR   | MQRGLFRYDV | TACETKVI   | YGFIAQLNE  | GRHLKKRPT |
| VvGGP-1   | ---A-SSGD---  | E          | ---NK-EPP | VDFLLDSL--- | ---LGEWEDR   | MQRGLFRYDV | TACETKVI   | YGFIAQLNE  | GRHLKKRPT |
| VvGGP-2   | ---R-VEVS---  | S          | ---EG-QPP | AAFLLNLL--- | ---LQWEDR    | MSQGLFRYDV | TTCETRIIP  | YGFIAQLNE  | GRHLKKRPT |
| VcGGP     | ---SSYSAFS--- | SSIA       | ---LE-VPS | RSLLSAL---  | ---MTLWEDR   | ADRGLFRYDV | TLCPTRVL   | SRGFIAQLNE | GRATNKRPT |
| ZmGGP-E-1 | ---GS---      | Q          | ---ED-AAS | TKLLVDIL--- | ---LSEWEDR   | MTRGLFRYDV | TACETKVI   | NLGFVAQLNE | GRHLKKRPT |
| ZmGGP-E-2 | ---T---       | E          | ---HE-GSN | LSPFLKLL--- | ---FNEWDDR   | KTRGLFHDDI | SSCETKVL   | EHNFVATLIE | GRDQKKRPT |
| ZmGGP-1   | ---GS---      | Q          | ---ED-AAS | TKLLVLSLV   | ---CFAPWQEDR | MTRGLFRYDV | TACETKVI   | NLGFVAQLNE | GRHLKKRPT |
| ZmGGP-2   | ---T---       | E          | ---HE-GSN | LSPFLKLL--- | ---FNEWDDR   | KTRGLFHDDI | SSCETKVL   | EHNFVATLIE | GRDQKKRPT |
| ZomGGP    | ---GSAV---    | A          | ---GK-NSP | IDFLNTLV--- | ---LQWEDR    | MAQGMFRYDV | TACETKII   | NHGFIAQLNE | GRHLQKRPT |

|           |            |            |            |          |                 |              |             |                |            |            |            |
|-----------|------------|------------|------------|----------|-----------------|--------------|-------------|----------------|------------|------------|------------|
| AcGGP     | FRVDKVLQPF | DESKFNFTKV | QGEVLFQFE  | --A--SDD | N--EV--         | ---QFFP      | NAPVDV---   | ---ENSPS       | VVAIN-VSP- | IEYGHVLLIP | RILECLPQRI |
| AcGGP-R-1 | FRVDKVLQPF | DGSKFNFTKV | QGEVLFQFE  | --A--SND | N--EV--         | ---QFFP      | NAPVDV---   | ---ENSPS       | VVAIN-VSP- | IEYGHVLLIP | SILECLPQRI |
| AcGGP-R-2 | FRVDQVLQPF | DENKFNFTKV | QGEVLFQFE  | --Q--SND | S--KS--         | ---HFPT      | SSSVNL-D--- | ---SNSPN       | VVAIN-VSP- | IEYGHVLLIP | RVLDCLPQRI |
| AdGGP     | FRVDKVLQPF | DESKFNFTKV | QGEVLFQFE  | --A--SND | N--EV--         | ---QFFP      | NAPVDV---   | ---ENSPS       | VVAIN-VSP- | IEYGHVLLIP | SILECLPQRI |
| AeGGP     | FRVDKVLQPF | DESKFNFTKV | QGEVLFQFE  | --A--SVD | N--EV--         | ---QFFP      | NAPVDV---   | ---ENSPS       | VVAIN-VSP- | IEYGHVLLIP | RILECLPQRI |
| ArGGP     | FRVDKVLQPF | DESKFNFTKV | QGEVLFQFE  | --A--SDD | N--EV--         | ---QFFP      | NAPVDV---   | ---ENSPS       | VVAIN-VSP- | IEYGHVLLIP | RILECLPQRI |
| AmhGGP-1  | FRVDKVLQPF | DGSKFNFTKV | QGEVLFQFE  | --A--SED | G--EA--         | ---YFTP      | GAPIDV---   | ---ENSPS       | VVAIN-VSP- | IEYGHVLLIP | RIFECPLQRI |
| AmhGGP-2  | FRVDQVLQPF | DDNKFNFTKV | QGEVLFQFE  | --P--SND | M--TC--         | ---YHP       | SAPVSL-E--- | ---SESPN       | I----VSP-  | IEYGHVLLIP | RIFECPLQRI |
| AncGGP-3  | FRIDEVLQPF | DGDKFNFTKI | QGEVLFQFE  | --E--SSN | G--KA--         | ---GYQP      | SAPIMS---   | ---SSSPN       | IIAIN-VSP- | IAHGHVLLIP | RILDCLPQRI |
| AncGGP-1  | FRVDKVLQPF | DPKFNFTKV  | QGEVLFQFE  | --A--SGS | H--KS--         | ---SFSE      | RAPVDG---   | ---TKAPN       | VLAIN-VSP- | IEYGHVLLIP | RVLDCLPQRI |
| AncGGP-2  | FRVDQVLQPF | DANKFNFTKV | QGEVLFQFE  | --P--ATN | A--VVIN         | ---TPVDG     | ---         | ---TRSPS       | VVAIN-VSP- | IEYGHVLLIP | RVLDCLPQRI |
| AqGGP     | FRVDKVLQPF | DENKFNFTKV | QGEVLFQFE  | EKV--NDD | F--GA--         | ---QFVA      | SAPIDT---   | ---ENSPS       | VVAIN-VSP- | IEYGHVLLIP | KILEHFPQRI |
| AhGGP-1   | FRVDKVLQSF | DGTFNFTKV  | QGEVLFQFE  | --A--GED | A--QV--         | ---QFFP      | CMPLDP---   | ---ENSPN       | VVAIN-VSP- | IEYGHVLLIP | RVLDCLPQRI |
| AhGGP-2   | FRVDKVLQSF | DGNKFNFTKV | QGEVLFQFE  | --A--SNN | DDD--SKI--      | ---QFLP      | SIPLDA---   | ---DNSPS       | VVAIN-VSP- | IEYGHVLLIP | RVLDCLPQRI |
| AlGGP-1   | FRVDKVLQSF | DGSKFNFTKV | QGEVLFQFE  | --A--GED | G--QV--         | ---QFFP      | CMPLDP---   | ---ENSPS       | VVAIN-VSP- | IEYGHVLLIP | RVLDCLPQRI |
| AlGGP-2   | FRVDKVLQSF | DGNKFNFTKV | QGEVLFQFE  | --A--SDN | DDD--SQI--      | ---QFLP      | SIPLDA---   | ---DNSPS       | VVAIN-VSP- | IEYGHVLLIP | RVLDCLPQRI |
| AtGGP-1   | FRVDKVLQSF | DGSKFNFTKV | QGEVLFQFE  | --A--GED | A--QV--         | ---QFFP      | CMPLDP---   | ---ENSPS       | VVAIN-VSP- | IEYGHVLLIP | RVLDCLPQRI |
| AtGGP-2   | FRVDKVLQSF | DGNKFNFTKV | QGEVLFQFE  | --A--STN | DDD--SEI--      | ---QFLA      | SMPLDA---   | ---DNSPS       | VVAIN-VSP- | IEYGHVLLIP | RVLDCLPQRI |
| BosGGP-1  | FRVDKVLQSF | DGSKFNFTKV | QGEVLFQFE  | --A--GED | G--QV--         | ---QFFP      | CMPLDP---   | ---ENSPS       | VVAIN-VSP- | IEYGHVLLIP | RVLDCLPQRI |
| BosGGP-2  | FRVDKVLQSF | DGNKFNFTKV | QGEVLFQFE  | --A--SND | DDD--SRI--      | ---QFFP      | STPLDA---   | ---DNSPS       | VVAIN-VSP- | IEYGHVLLIP | RVLDCLPQRI |
| BdGGP-1   | FRVDKVLQSF | DAKFNFTKV  | QGEVLFQFE  | --N--GGG | D--DS--         | ---YFLK      | SAPTVA---   | ---DRAPN       | VVAIN-VSP- | IEYGHVLLIP | RVLDRLPQRI |
| BdGGP-2   | FRVDKVLQSF | HSKFNFTKV  | QGEVLFQFE  | --N--GGG | D--SS--         | ---YFLA      | NAPNTE-S--- | ---SHPPS       | VVAIN-VSP- | IEYGHVLLIP | RVLDRLPQRI |
| BdGGP-3   | FGMNQVLQPF | DSGKFNFTKV | RPEEVIPTFH | --E--TED | E--SD--         | ---RYFD      | GAPPTV---   | ---LASPS       | SILIN-VSP- | IGYCHVLLIP | RILECLPQRI |
| BsGGP-1   | FRVDKVLQSF | DAKFNFTKV  | QGEVLFQFE  | --N--GGG | D--DS--         | ---YFLK      | SAPTVA---   | ---DCAPN       | VVAIN-VSP- | IEYGHVLLIP | RVLDRLPQRI |
| BsGGP-2   | FRVDKVLQSF | DSKFNFTKV  | QGEVLFQFE  | --N--GGG | D--RS--         | ---YFLA      | NAPNTE-S--- | ---SHPPS       | VVAIN-VSP- | IEYGHVLLIP | RVLDRLPQRI |
| BsGGP-3   | FGMNQVLQPF | DSGKFNFTKV | RPEEVIPTFH | --E--TEN | E--SD--         | ---RYFD      | GAPPTV---   | ---LGSPS       | SILIN-VSP- | IGYCHVLLIP | RILECLPQRI |
| BoGGP-1   | FRVDKVLQSF | DGNKFNFTKV | QGEVLFQFE  | --A--GED | S--EV--         | ---QFFP      | CMPLDA---   | ---ENSPS       | VVAIN-VSP- | IEYGHVLLIP | RVLDCLPQRI |
| BoGGP-2   | FRVDKVLQSF | DGSKFNFTKV | QGEVLFQFE  | --A--GHD | D--EA--         | ---RFFP      | CMPLVA---   | ---ENSPS       | VVAIN-VSP- | IEYGHVLLIP | RVLDCLPQRI |
| BoGGP-3   | FRVDQVLQPF | DANKFNFTKV | QGEVLFQFE  | --A--GED | C--EV--         | ---QFFP      | CMPLDA---   | ---ENSPR       | VVAIN-VSP- | IEYGHVLLIP | QVFDCLPQRI |
| BrGGP-1   | FRVDKVLQSF | DGNKFNFTKV | QGEVLFQFE  | --A--GED | C--EV--         | ---QFFP      | CMPLDS---   | ---ENSPS       | VVAIN-VSP- | IEYGHVLLIP | RVLDCLPQRI |
| BrGGP-2   | FRVDKVLQSF | DGNKFNFTKV | QGEVLFQFE  | --A--GED | C--EV--         | ---QFFP      | CMPLDA---   | ---ENSPS       | VVAIN-VSP- | IEYGHVLLIP | RVLDCLPQRI |
| BrGGP-3   | FRVDKVLQSF | DGNKFNFTKV | QGEVLFQFE  | --A--GED | E--EV--         | ---QFLP      | CMPLLA---   | ---ENSPS       | VVAIN-VSP- | IEYGHVLLIP | RVLDCLPQRI |
| BrGGP-4   | FPVDQVLQPF | DVNKFNFTKV | QGEVLFQFE  | --A--GED | D--DLPLEA       | ---          | ---         | ---GNSPS       | VVAIN-VSP- | IEYGHVLLIP | QVFDCLPQRI |
| CgGGP-1   | FRVDKVLQSF | DGSKFNFTKV | QGEVLFQFE  | --A--GED | D--QV--         | ---QFFP      | CMPLDP---   | ---ENSPS       | VVAIN-VSP- | IEYGHVLLIP | RVLDCLPQRI |
| CgGGP-2   | FRVDKVLQSF | DGNKFNFTKV | QGEVLFQFE  | --A--RSD | DDD--SGI--      | ---QFLP      | SIPLDA---   | ---DNSPS       | VVAIN-VSP- | IEYGHVLLIP | RVLDCLPQRI |
| CrGGP-1   | FRVDKVLQSF | DGSKFNFTKV | QGEVLFQFE  | --A--GED | D--QV--         | ---QFFP      | CMPLDP---   | ---ENSPS       | VVAIN-VSP- | IEYGHVLLIP | RVLDCLPQRI |
| CrGGP-2   | FRVDKVLQSF | DGNKFNFTKV | QGEVLFQFE  | --A--RSD | DDD--SGI--      | ---QFFP      | SIPLDA---   | ---DNSPS       | VVAIN-VSP- | IEYGHVLLIP | RVLDCLPQRI |
| ChrGGP    | FSADRVMPQF | DPARFHFNKA | AMGEVLFQFE | --A--DAT | ASA--TSAT       | ---ATAAPRLLF | SAPMAKSALL  | ---ASNPSVSGSPN | LVLIN-VSP- | IDHCHVLLIP | RVLDCLPQRI |
| CcGGP-1   | FRVDKVLQSF | DGNKFNFTKV | QGEVLFQFE  | --A--SED | G--EV--         | ---QFFP      | SAPIDV---   | ---ENSPS       | VVAIN-VSP- | IEYGHVLLIP | RVLDCLPQRI |
| CcGGP-2   | FRIDQVLQPF | DENKFNFTKI | QGEVLFQFE  | --D--    | ---             | ---          | ---         | ---SKSPS       | VVAIN-VSP- | IEYGHVLLIP | RVLDCLPQRI |
| CcGGP-3   | FRVDKVLQSF | DGNKFNFTKV | QGEVLFQFE  | --A--SED | G--EV--         | ---QFFP      | SAPIDV---   | ---ENSPS       | VVAIN-VSP- | IEYGHVLLIP | RVLDCLPQRI |
| CsGGP-1   | FRIDQVLQSF | DENKFNFTKI | QGEVLFQFE  | --D--    | ---             | ---          | ---         | ---SKSPS       | VVAIN-VSP- | IEYGHVLLIP | RVLDCLPQRI |
| CosGGP    | FCVDQVQRF  | DNGKFNFTKA | LQEVLFQFE  | --A--ADM | SSK--GS--       | ---AFLE      | LAPV---     | ---GSGPN       | LVLIN-VSP- | IEYGHVLLIP | RALDRNLQRI |
| CusGGP    | FRVDKVLQSF | DGNKFNFTKV | QGEVLFQFE  | --A--NEN | G--NT--         | ---QFIP      | NDAIDL---   | ---ENSPS       | VVAIN-VSP- | IEYGHVLLIP | RILDCLPQRI |
| DcGGP-1   | FRVDKVLQSF | DGSKFNFTKV | QGEVLFQFE  | --A--SEE | D--EI--         | ---HFFP      | DASIDV---   | ---GNSPS       | VVAIN-VSP- | IEYGHVLLIP | HVLECLPQRI |
| DcGGP-2   | FRVDKVLQSF | DGSKFNFTKV | QGEVLFQFE  | --A--SED | G--EI--         | ---QFFP      | NAPIDV---   | ---ANSPS       | VVAIN-VSP- | IEYGHVLLIP | RVLDCLPQRI |
| DsGGP     | VVVDKVCQPF | TEAKFNFKKA | YLKEVLFQFE | --P--RSD | SGA--SGAHINDPSA | ---MANKDDEA  | ---         | ---SYEPLELL    | SAAA       | ---        | ---        |
| DgGGP-1   | FRVDKVLQSF | DGSKFNFTKV | QGEVLFQFE  | --A--SVA | G--EA--         | ---QFFP      | NAPIDV---   | ---ENSPS       | VVAIN-VSP- | IEYGHVLLIP | RVLDCLPQRI |
| DgGGP-2   | FRVDKVLQSF | DGSKFNFTKV | QGEVLFQFE  | --A--SED | G--EV--         | ---QFFA      | KAPIDA---   | ---DNSPS       | VVAIN-VSP- | IEYGHVLLIP | RVLDCMPQRI |

|          |            |            |             |            |         |          |        |      |       |      |            |            |           |             |            |             |            |
|----------|------------|------------|-------------|------------|---------|----------|--------|------|-------|------|------------|------------|-----------|-------------|------------|-------------|------------|
| EgGGP-3  | FRVDQVLQDF | DEKKNFNTKV | GQEEVLFMFE  | --Q----    | SDD     | C-----   | -----  | YS-- | ----- | HFFP | SAPAIF-K-- | -----      | PTSPN     | VVAIN-VSPS  | IQYGHLLLP  | RVLDCLPQRI  |            |
| EgGGP-4  | FRVDQVLQDF | DEKKNFNTKV | GQEEVLFMFE  | --Q----    | SDD     | C-----   | -----  | YS-- | ----- | HFFP | SAPAIF-K-- | -----      | PTSPN     | V-----      | VSP-       | IEYGHVLLIP  | RVLDCLPQRI |
| EgGGP-5  | FRVDQVLQDF | DEKKNFNTKV | GQEEVLFMFE  | --Q----    | SDD     | C-----   | -----  | YS-- | ----- | HFFP | SAPASF-K-  | -----      | PTSPN     | VVAIN-VSP-  | -----      | IEYGHVLLIP  | HVLDCLPQRI |
| EsGGP-1  | FRVDKVLQSF | DGNKFNFTKV | GQEEVLFQFE  | --A----    | GED     | G-----   | -----  | EV-- | ----- | QFFF | CMPLDA--   | -----      | ENSPS     | VVAIN-VSP-  | IEYGHVLLIP | RVLDCLPQRI  |            |
| EsGGP-2  | FRVDKVLQSF | DGNKFNFTKV | GQEEVLFQFE  | --A----    | DDD     | DDD----- | -----  | REI- | ----- | QFFF | NMPLDA--   | -----      | DNSPS     | VVAIN-VSP-  | IEYGHVLLIP | CVLDCLPQRI  |            |
| FvGGP-1  | FRVDKVLQPF | DGSKFNFTKV | GQEEVLFQFE  | --A----    | SED     | G-----   | -----  | EV-- | ----- | QFHF | NAPIDV--   | -----      | ENSPS     | VVAIN-VSP-  | IEYGHVLLIP | RILESCLPQRI |            |
| FvGGP-2  | FRVDKVLQPF | DGSKFNFTKV | GQEEVLFQFE  | --A----    | SED     | G-----   | -----  | EV-- | ----- | QFHF | NAPIDV--   | -----      | ENSPN     | VVAIN-VSP-  | IEYGHVLLIP | RILESCLPQRI |            |
| FvGGP-3  | FRVDKVLQPF | DGSKFNFTKV | GQEEVLFQFE  | --A----    | SED     | G-----   | -----  | EV-- | ----- | QFHF | NAPIDI--   | -----      | ATSPS     | VVAIN-VSP-  | IEYGHVLLIP | RILESCLPQRI |            |
| GmGGP-1  | FRVDKVLQPF | DENKFNFTKV | GQEEVLFQFE  | --A----    | SED     | G-----   | -----  | QV-- | ----- | QFFF | NAPVDV--   | -----      | DNSPS     | FVAIN-VSP-  | IEYGHVLLIP | RIFECLPQRI  |            |
| GmGGP-2  | FRVDKVLQPF | DENKFNFTKV | GQEEVLFQFE  | --A----    | SED     | G-----   | -----  | QV-- | ----- | QFFF | NAPVDV--   | -----      | DNSPS     | FVAIN-VSP-  | IEYGHVLLIP | RIFECLPQRI  |            |
| GmGGP-3  | FRVDKVLQPF | DENKFNFTKV | GQEEVLFQFE  | --A----    | SND     | G-----   | -----  | EV-- | ----- | QFFF | NAPIDV--   | -----      | ENSPS     | FVAIN-VSP-  | IEYGHVLLIP | RIFECLPQRI  |            |
| GmGGP-4  | FRVDKVLQPF | DENKFNFTKV | GQEEVLFQLE  | --A----    | SND     | G-----   | -----  | EA-- | ----- | QFFF | NVPIDV--   | -----      | ENSPS     | FVAIN-VSP-  | IEYGHVLLIP | QIFECLPQRI  |            |
| GnmGGP   | FRVDKVLQDF | DPKKNFNTKV | GQEEMLFRFE  | --E----    | SAA     | G-----   | -----  | IT-- | ----- | EFLE | KGPV--     | -----      | LDSPN     | VIVIN-VSP-  | IEYGHVLLIP | RVLDCLPQRI  |            |
| GrGGP-1  | FRVDKVLQPF | DGNKFNFTKV | GQEEVLFQFE  | --A----    | SED     | G-----   | -----  | EV-- | ----- | QFYP | NAPIDV--   | -----      | ESSPS     | VVAIN-VSP-  | IEYGHVLLIP | RIFECLPQRI  |            |
| GrGGP-2  | FRVDKVLQPF | DGNKFNFTKV | GQEEVLFQFE  | --A----    | SED     | G-----   | -----  | EV-- | ----- | QFYP | SAPIDV--   | -----      | ENSPS     | VVAIN-VSP-  | IEYGHVLLIP | RILECLPQRI  |            |
| GrGGP-3  | FRVDKVLQPF | DGNKFNFTKV | GQEEVLFQFE  | --A----    | SED     | G-----   | -----  | EV-- | ----- | QFFF | NAPIDV--   | -----      | ENHPS     | VVAIN-VSP-  | IEYGHVLLIP | RILECLPQRI  |            |
| KfGGP-1  | FRVDKVLQPF | DEKKNFNTKI | GQEEVVFQFE  | --A----    | SEC     | G-----   | -----  | EV-- | ----- | QFFF | EAPIEV--   | -----      | ENRPN     | VVAIN-VSP-  | IEYGHVLLIP | RIFECLPQRI  |            |
| KfGGP-2  | FRVDKVLQPF | DEKKNFNTKI | GQEEVVFQFE  | --A----    | SEC     | G-----   | -----  | EV-- | ----- | QFFF | EAPIHV--   | -----      | ENHPS     | VVAIN-VSP-  | IEYGHVLLIP | RIFECLPQRI  |            |
| KlGGP-1  | FRVDKVLQPF | DEKKNFNTKI | GQEEVVFQFE  | --A----    | SEC     | G-----   | -----  | EV-- | ----- | QFFF | EAPIEV--   | -----      | ENRPN     | VVAIN-VSP-  | IEYGHVLLIP | RIFECLPQRI  |            |
| KlGGP-2  | FRVDKVLQPF | DEKKNFNTKI | GQEEVVFQFE  | --A----    | SEC     | G-----   | -----  | EV-- | ----- | QFFF | EAPIHV--   | -----      | ENHPS     | VVAIN-VSP-  | IEYGHVLLIP | RIFECLPQRI  |            |
| KlGGP-3  | FRVDKVLQPF | DEKKNFNTKI | GQEEVVFQFE  | --A----    | SEC     | G-----   | -----  | EV-- | ----- | QFFF | EAPIHV--   | -----      | ENHPS     | VVAIN-VSP-  | IEYGHVLLIP | RIFECLPQRI  |            |
| KuGGP    | FRVDKVLQPF | DGNKFNFTKV | GQEEVLFQFD  | --A----    | SEN     | G-----   | -----  | QV-- | ----- | EFFP | DAPVDA--   | -----      | DKSPS     | VVAIN-VSP-  | IEYGHVLLIP | RILECLPQRI  |            |
| MeGGP    | FRVDKVLQPF | DSSKFNFTKV | GQEEVLFQFE  | --A----    | SED     | G-----   | -----  | EV-- | ----- | HFFP | SAPIDV--   | -----      | ENSPS     | VVAIN-VSP-  | IEYGHVLLIP | RIFECLPQRI  |            |
| MeGGP-1  | FRVDKVLQPF | DGNKFNFTKV | GQEEVLFQFE  | --P----    | SEN     | G-----   | -----  | EV-- | ----- | QFFF | SASIDV--   | -----      | DNSTS     | VVAIN-VSP-  | IEYGHVLLIP | RILECLPQRI  |            |
| MeGGP-2  | FRVDKVLQPF | DGNKFNFTKV | GQEEVLFQFE  | --S----    | SED     | G-----   | -----  | DV-- | ----- | QFFF | SAPIDV--   | -----      | DNSTP     | VVAIN-VSP-  | IEYGHVLLIP | RILECLPQRI  |            |
| MeGGP-3  | FRVDKVLQAF | DETKFNFTKI | GQEEVLFQFE  | --P----    | SND     | L-----   | -----  | KS-- | ----- | EFVF | TAPPTA-D-  | -----      | STSPS     | VVAIN-VSP-  | IEYGHVLLIP | RVLDCLPQRI  |            |
| MpGGP    | FRVDQVLQPY | DAKKNFNTKV | DQEEILFQFD  | --E----    | SSD     | H-----   | -----  | CS-- | ----- | EYSE | QAFV--     | -----      | GESPN     | VVAIN-VSP-  | IEYGHVLLIP | QVKSQIPQRI  |            |
| MtGGP-1  | FRVDKVLQPF | DENKFNFTKV | GQEEVLFQFE  | --A----    | SED     | G-----   | -----  | EV-- | ----- | QFYP | NAPIDV--   | -----      | DNSTP     | FVAIN-VSP-  | IEYGHVLLIP | RIFECLPQRI  |            |
| MtGGP-2  | FRVDKVLQPF | DETKFNFTKV | GQEEVLFQFK  | --S----    | SSD     | G-----   | -----  | ET-- | ----- | QFFF | DAPIDV--   | -----      | ENSPS     | FVAIN-VSP-  | IEYGHVLLIP | RIFECLPQRI  |            |
| MpGGP    | FRVDQVQCFE | DAGKFNFTKA | DKAEIFFRFA  | --P----    | GGV     | GQT----- | -----  | RS-- | ----- | EYVA | SAPIEYADAD | RVRGESDAPT | VVFN-VSP- | IEYGHVLLIP  | RVTDCLPQRI |             |            |
| MsGGP    | FAVDEVVQAF | DGGKFNFTKA | DKAEIFLFAFE | --R----    | GDR     | AMK----- | -----  | SS-- | ----- | AYNS | AKTI--     | -----      | ESSPN     | VMLIN-VSP-  | IEYGHVLLIP | RVTDCLPQRI  |            |
| MgGGP-1  | FRVDKVLQPF | DETKFNFTKV | GQEEVLFQFE  | --P----    | SEN     | N-----   | -----  | HV-- | ----- | QFFF | NAPIDL--   | -----      | ENSPS     | VVAIN-VSP-  | IEYGHVLLIP | RIFECLPQRI  |            |
| MgGGP-2  | FRVDKVLQPF | DETKFNFTKV | GQEEVLFQFE  | --A----    | SND     | N-----   | -----  | EV-- | ----- | HYFF | NAPIDS--   | -----      | DNSTP     | VVAIN-VSP-  | IEYGHVLLIP | RILECLPQRI  |            |
| MaGGP-1  | FRVDKVLQPF | DPKKNFNTKV | GQEEVLFQFE  | --A----    | GED     | D-----   | -----  | KA-- | ----- | RFLF | SAAVGE--   | -----      | TNTPS     | VVAIN-VSP-  | IEYGHVLLIP | RVLDCLPQRI  |            |
| MaGGP-2  | FRVDKVLQAF | DPKKNFNTKV | GQEEVLFQFE  | --A----    | AGG     | D-----   | -----  | EA-- | ----- | HLFE | SDGNEG--   | -----      | TKSPS     | VVAIN-VSP-  | IEYGHVLLIP | RVLDCLPQRI  |            |
| MaGGP-3  | FRVDKVLQPF | DRKKNFNTKV | GQEEVLFQFE  | --P----    | GES     | G-----   | -----  | SG-- | ----- | RLLE | DDAVGD--   | -----      | ANAPN     | VVAIN-VSP-  | IEYGHVLLIP | RVLDCLPQRI  |            |
| MaGGP-4  | FRIDRVLQPF | DGKKNFNTKI | AQEEMLIRFE  | --E----    | SEN     | D-----   | -----  | DR-- | ----- | GFFE | NTPAIDV--  | -----      | SESPN     | VVAIN-VSP-  | IEYGHVLLIP | RILDCLPQRI  |            |
| OtGGP    | FRVDKVLQPF | DPKKNFNTKV | GQEEVLFQFE  | --S----    | STG     | D-----   | -----  | DS-- | ----- | YFLE | SASIPA--   | -----      | NRAPN     | VVAIN-VSP-  | IEYGHVLLIP | RVLDCLPQRI  |            |
| OsgGGP-1 | FRVDKVLQPF | DAKKNFNTKV | GQEEVLFQFE  | --N----    | GGG     | D-----   | -----  | DS-- | ----- | PFVE | SSPISV-A-  | -----      | DRAPN     | VVAIN-VSP-  | IEYGHVLLIP | RVLDCLPQRI  |            |
| OsgGGP-2 | FGMNQVLQPF | DSKFNFTKV  | SPEEVLPTFK  | --E----    | SQN     | D-----   | -----  | SV-- | ----- | KYFD | NVPHAV--   | -----      | AAASP     | AILIN-VSP-  | IEYGHVLLIP | RIQDCLPQRI  |            |
| OlGGP    | FSVDKVCQDF | DANKFNFTKA | DLKEVLFQFT  | --K-----   | LAGEAD  | NVS----- | -----  | RS-- | ----- | VFPE | SAAV--     | -----      | GESPT     | VVILIN-VSP- | IEYGHVLLIP | RVTDCLPQRI  |            |
| PhGGP-1  | FRVDKVLQPF | DPKKNFNTKV | GQEEVLFQFE  | --N----    | GAG     | D-----   | -----  | DS-- | ----- | YFLN | NAPVTA-A-  | -----      | DRAPN     | VVAIN-VSP-  | IEYGHVLLIP | RVLDCLPQRI  |            |
| PhGGP-2  | FGMNQVLQPF | DSGKFNFTKV | RPEEVLFRFC  | --E----    | TDK     | D-----   | -----  | SA-- | ----- | QYFG | GAPDTI--   | -----      | SASSS     | AILIN-VSP-  | IEYGHVLLIP | KIQDCLPQRI  |            |
| PvGGP-1  | FRVDKVLQPF | DPKKNFNTKV | GQEEVLFQFE  | --N----    | GAG     | D-----   | -----  | DS-- | ----- | YFLN | NAPITA-A-  | -----      | DRAPN     | VVAIN-VSP-  | IEYGHVLLIP | HVLDCLPQRI  |            |
| PvGGP-2  | FRVDKVLQPF | DPKKNFNTKV | GQEEVLFQFE  | --N----    | GAG     | D-----   | -----  | DS-- | ----- | YFLN | NAPITA-A-  | -----      | DRAPN     | VVAIN-VSP-  | IEYGHVLLIP | RVLDCLPQRI  |            |
| PvGGP-3  | -----      | PF         | DSGKFNFTKV  | RPEEVLFRFC | --E---- | TDK      | D----- | SA-- | ----- | QYFG | GAPDTI--   | -----      | SASSS     | VILIN-VSP-  | IEYGHVLLIP | KIQDCLPQRI  |            |
| PhvGGP-1 | FRVDKVLQPF | DESKFNFTKV | GQEEVLFQFE  | --A----    | SDD     | G-----   | -----  | QI-- | ----- | QFFF | NAPVDV--   | -----      | DNSTP     | FVAIN-VSP-  | IEYGHVLLIP | RIFECLPQRI  |            |
| PhvGGP-2 | FRVDKVLQPF | DESKFNFTKV | GQEEVLFQFE  | --P----    | SDD     | G-----   | -----  | EA-- | ----- | QFSP | NAPIDV--   | -----      | DNSTP     | FVAIN-VSP-  | IEYGHVLLIP | RIFECLPQRI  |            |
| PpGGP-1  | FRIDQVLQPF | DPKKNFNTKV | GQEEVLFQFM  | --P----    | NDS     | D-----   | -----  | MS-- | ----- | EYFE | KATV--     | -----      | SSSPN     | VVAIN-VSP-  | IEYGHVLLIP | RVLDCLPQRI  |            |
| PpGGP-2  | FRVDQVLQAF | DPKKNFNTKV | GQEEVLFQFM  | --P----    | SED     | E-----   | -----  | VS-- | ----- | DYFE | KAPV--     | -----      | LASPN     | VVAIN-VSP-  | IEYGHVLLIP | RVLDCLPQRI  |            |
| PpGGP-3  | FRVDQVLQPF | DSKKNFNTKV | GQEEVLFQFG  | --P----    | SED     | G-----   | -----  | VS-- | ----- | EYFE | KALV--     | -----      | LNSPN     | VVAIN-VSP-  | IEYGHVLLIP | RVLDCLPQRI  |            |
| PaGGP-1  | FRVDKVLQDF | DPSKFNFTKV | GQEEVLFQFE  | --E----    | SEE     | N-----   | -----  | KV-- | ----- | QYLE | KALV--     | -----      | LDSPN     | VVAIN-VSP-  | IEYGHVLLIP | RVLDCLPQRI  |            |
| PaGGP-2  | FRVDKVLQDF | DPSKFNFTKV | GQEEVLFQFE  | --E----    | SEE     | N-----   | -----  | KV-- | ----- | QYLE | KALV--     | -----      | LDSPN     | VVAIN-VSP-  | IEYGHVLLIP | RVLDCLPQRI  |            |
| PaGGP-3  | FRVDKVLQDF | DPSKFNFTKV | GQEEVLFQFE  | --E----    | SEE     | N-----   | -----  | KV-- | ----- | QYLE | KAPV--     | -----      | LDSPN     | VVAIN-VSP-  | IEYGHVLLIP | RVLDCLPQRI  |            |
| PsGGP-1  | FRVDKVLQDF | DPSKFNFTKV | GQEEVLFQFE  | --E----    | SAE     | N-----   | -----  | KV-- | ----- | QYLE | KALV--     | -----      | LDSPN     | VVAIN-VSP-  | IEYGHVLLIP | RVLDCLPQRI  |            |
| PsGGP-2  | FRVDKVLQDF | DRSKFNFTKV | GQEEVLFQFE  | --E----    | SEE     | G-----   | -----  | KV-- | ----- | QYLE | KAPV--     | -----      | LDSPN     | VVAIN-VSP-  | IEYGHVLLIP | RVLDCLPQRI  |            |
| PsGGP-3  | FRVDKVLQDF | DPSKFNFTKV | GQEEVLFQFE  | --E----    | SGE     | D-----   | -----  | KV-- | ----- | QYLE | KAPV--     | -----      | LDSPN     | VVAIN-VSP-  | IEYGHVLLIP | RVLDCLPQRI  |            |
| PtGGP-1  | FRVDKVLQDF | DPSKFNFTKV | GQEEVLFQFE  | --E----    | SEE     | N-----   | -----  | KV-- | ----- | QYLE | KALV--     | -----      | LDSPN     | VVAIN-VSP-  | IEYGHVLLIP | RVLDCLPQRI  |            |
| PtGGP-2  | FRVDKVLQDF | DPCKFNFTKV | GQEEVLFQFE  | --E----    | SEE     | D-----   | -----  | KV-- | ----- | QYLE | KAPV--     | -----      | LDSPN     | VVAIN-VSP-  | IEYGHVLLIP | RVLDCLPQRI  |            |
| PtGGP-3  | FRVDKVLQDF | DPSKFNFTKV | GQEEVLFQFE  | --E----    | SEE     | N-----   | -----  | KI-- | ----- | QYLE | KAPV--     | -----      | FDSPN     | VVAIN-VSP-  | IEYGHVLLIP | RVLDCLPQRI  |            |
| PtGGP-4  | FRVDKVLQDF | DPSKFNFTKV | GQEEVLFQFE  | --E----    | SEE     | D-----   | -----  | KV-- | ----- | QYLE | KAPV--     | -----      | LDSPN     | VVAIN-VSP-  | IEYGHVLLIP | RVLDCLPQRI  |            |
| PtGGP-5  | FRVDKVLQDF | DPCKFNFTKV | GQEEVLFQFE  | --E----    | NEE     | G-----   | -----  | KV-- | ----- | QYFE | KAPV--     | -----      | LDSPN     | VVAIN-VSP-  | VEYGHVLLIP | RVLDCLPQRI  |            |
| PotGGP-1 | FRVDKVLQPF | DGNKFNFTKV | GQEEVLFQFG  | --A----    | SED     | G-----   | -----  | EV-- | ----- | QFFF | DAPIDP--   | -----      | ENSPS     | VVAIN-VSP-  | IEYGHVLLIP | RVLDCLPQRI  |            |
| PotGGP-2 | FRVDKVLQPF | DGNKFNFTKV | GQEEVLFQFG  | --E----    | SED     | G-----   | -----  | EV-- | ----- | KFFF | DATIDA--   | -----      | ENSPS     | VVAIN-VSP-  | IEYGHVLLIP | RVLDCLPQRI  |            |
| PotGGP-3 | FRVDKVLQDF | DETKFNFTKI | GH--FRFE    | --K----    | SID     | H-----   | -----  | NR-- | ----- | HFFP | SAPITAD-S  | -----      | NNSNSS    | VVAIN-VSP-  | IEYGHVLLIP | QVNLDCLPQRI |            |
| PrpGGP   | FRVDKVLQPF | DGNKFNFTKV | GQEEVLFQFE  | --A----    | SED     | G-----   | -----  | EV-- | ----- | QFIP | SAPIEP--   | -----      | ENSPS     | VVAIN-VSP-  | IEYGHVLLIP | RILEHLPQRI  |            |
| RcGGP-1  | FRVDKVLQPF | DGNKFNFTKV | GQEEVLFQFE  | --A----    | SED     | G-----   | -----  | DI-- | ----- | QFFF | SAPIDL--   | -----      | KNSTP     | VVAIN-VSP-  | IEYGHVLLIP | RILEHLPQRI  |            |
| RcGGP-2  | FRVDKVLQPF | DGNKFNFTKV | GQEEVLFQFE  | --A----    | SED     | D-----   | -----  | DI-- | ----- | QFFF | SAPIDV--   | -----      | ENSPS     | VVAIN-VSP-  | IEYGHVLLIP | RILDCLPQRI  |            |
| RcGGP-3  | FRVDNVLQSF | DDSKFNFTKI | GQEEVLFQFE  | --Q----    | GQE     | N-----   | -----  | MS-- | ----- | HFFP | NPPPSADD-  | -----      | SSSPS     | IVAIN-VSP-  | IEYGHVLLIP | RVLDCFPQRI  |            |
| SpGGP-1  | FRIDKVLQPF | DENKFNFTKV | GQEEVLFQFG  | --E----    | SED     | G-----   | -----  | EG-- | ----- | RFFT | DATIDP--   | -----      | ENSPS     | VVAIN-VSP-  | IEYGHVLLIP | RVLDCLPQRI  |            |
| SpGGP-2  | FRVDKVLQPF | DGNKFNFTKV | GQEEVLFQFG  | --A----    | SEE     | G-----   | -----  | EA-- | ----- | QFFF | DAPVDP--   | -----      | ENSTP     | VVAIN-VSP-  | IEYGHVLLIP | RVLDCLPQRI  |            |
| SpGGP-3  | FRVDKVLQDF | DETKFNFTKI | GQEEVLFQFE  | --K----    | SND     | H-----   | -----  | KR-- | ----- | RFFF | TAPVPTAD-  | -----      | SDSSR     | VVAIN-VSP-  | IEYGHVLLIP | QVNLDCLPQRI |            |
| SmGGP-1  | FRVDQVLQDF | DHKKFNFTKV | GQEEMLFCFE  | --Q----    | SNN     | D-----   | -----  | KS-- | ----- | HYHS | KAYI--     | -----      | RGSPN     | VVAIN-VSP-  | IEYGHVLLIP | RVLDCIPQRI  |            |
| SmGGP-2  | FRVDQVLQDF | DSKFNFTKV  | GQEEVLFQFD  | --P----    | SED     | G-----   | -----  | EV-- | ----- | QFFF | SAPITAD-S  | -----      | ENSPF     | ATSSNMVSP-  | IEYGHVLLIP | RVLDCIPQRI  |            |
| SmGGP-3  | FRVDQVLQDF | DPKKNFNTKV | NRNEVLFQFG  | --E----    | GE-     | D-----   | -----  | EA-- | ----- | GYDD | ITPI--     | -----      | LSSPD     | FVLIN-VSP-  | IEYGHVLLIP | RVPDFVQRI   |            |
| SlGGP-1  | FRVDKVLQPF | DPKKNFNTKV | GQEEVLFQFE  | --N----    | GAG     | D-----   | -----  | DS-- | ----- | YFLN | NAPITV-A-  | -----      | DRAPN     | VVAIN-VSP-  | IEYGHVLLIP | RVLDCLPQRI  |            |
| SlGGP-2  | FGMNQVLQPF | DSGKFNFTKV | RPEEVLFRFC  | --E----    | ADK     | D-----   | -----  | SA-- | ----- | QYFN | DAPDTV--   | -----      | SSSSS     | AILIN-VSP-  | IEYGHVLLIP | QIQDCLPQRI  |            |
| SvGGP-1  | FRVDKVLQPF | DPKKNFNTKV | GQEEVLFQFE  | --N----    | GAG     | D-----   | -----  | DS-- | ----- | YFLN | NAPITV-A-  | -----      | DRAPN     | VVAIN-VSP-  | IEYGHVLLIP | RVLDCLPQRI  |            |
| SvGGP-2  | FGMNQVLQPF | DSGKFNFTKV | RPEEVLFRFC  | --E----    | ADK     | D-----   | -----  | SA-- | ----- | QYFN | DAPDTI--   | -----      | SSSSS     | AILIN-VSP-  | IEYGHVLLIP | QIQDCLPQRI  |            |
| SlGGP-1  | FRVDKVLQPF | DGSKFNFTKV | GQEEVLFQFE  | --A----    | SEE     | D-----   | -----  | EV-- | ----- | QLYP | DAPIDP--   | -----      | EKSPS     | VVAIN-VSP-  | IEYGHVLLIP | KVLECLPQRI  |            |
| SlGGP-2  | FCIDKVLQPF | DENKFNFTKV | GQEEVLFQFE  | --P----    | STD     | Y-----   | -----  | KA-- | ----- | HYFS | GMRVNS--   | -----      | GISPS     | IVAIN-VSP-  | IEYGHVLLIP | RVLDCLPQRI  |            |
| StGGP-1  | FRVDKVLQPF | DGSKFNFTKV | GQEEVLFQFE  | --A----    | SEE     | D-----   | -----  | EV-- | ----- | QLYP | DAPIDP--   | -----      | EKSPS     | VVAIN-VSP-  | IEYGHVLLIP | KVLECLPQRI  |            |
| StGGP-2  | FCIDKVLQPF | DENKFNFTKV | GQEEVLFQFE  | --P----    | STD     | Y-----   | -----  | KP-- | ----- | HYFS | GMRVNG--   | -----      | GISPS     | IVAIN-VSP-  | IEYGHVLLIP | RVLDCLPQRI  |            |
| SbGGP-1  | FRVDKVLQPF | DPKKNFNTKV | GQEEVLFQFE  | --N----    | GDD     | D-----   | -----  | DS-- | ----- | YFLN | DAPITV-A-  | -----      | DRAPN     | VVAIN-VSP-  | IEYGHVLLIP | RVLDCLPQRI  |            |
| SbGGP-2  | FTMNQVLQPF | VSEKFNFTKV | SPEVLFQFE   | --E----    | TEK     | D-----   | -----  | SA-- | ----- | QYFD | GVPDVT--   | -----      | SASSS     | AILIN-VSP-  | IEYGHVLLIP | KIQDCLPQRI  |            |
| SfGGP-1  | FRVDQVLQPF | DGKKNFNTKV | GQEEVLFQFE  | --E----    | SED     | G-----   | -----  | TS-- | ----- | QYFE | KAPV--     |            |           |             |            |             |            |



















|           |         |              |       |       |       |       |
|-----------|---------|--------------|-------|-------|-------|-------|
| PaGGP-2   | P-----  | -----        | ----- | ----- | ----- | ----- |
| PaGGP-3   | -----   | -----        | ----- | ----- | ----- | ----- |
| PsGGP-1   | P-----  | -----        | ----- | ----- | ----- | ----- |
| PsGGP-2   | P-----  | -----        | ----- | ----- | ----- | ----- |
| PsGGP-3   | -----   | -----        | ----- | ----- | ----- | ----- |
| PtGGP-1   | P-----  | -----        | ----- | ----- | ----- | ----- |
| PtGGP-2   | -----   | -----        | ----- | ----- | ----- | ----- |
| PtGGP-3   | P-----  | -----        | ----- | ----- | ----- | ----- |
| PtGGP-4   | P-----  | -----        | ----- | ----- | ----- | ----- |
| PtGGP-5   | -----   | -----        | ----- | ----- | ----- | ----- |
| PotGGP-1  | H-----  | -----        | ----- | ----- | ----- | ----- |
| PotGGP-2  | Q-----  | -----        | ----- | ----- | ----- | ----- |
| PotGGP-3  | Y-----  | -----        | ----- | ----- | ----- | ----- |
| PrpGGP    | Q-----  | -----        | ----- | ----- | ----- | ----- |
| RcGGP-1   | Q-----  | -----        | ----- | ----- | ----- | ----- |
| RcGGP-2   | Q-----  | -----        | ----- | ----- | ----- | ----- |
| RcGGP-3   | H-----  | -----        | ----- | ----- | ----- | ----- |
| SpGGP-1   | Q-----  | -----        | ----- | ----- | ----- | ----- |
| SpGGP-2   | H-----  | -----        | ----- | ----- | ----- | ----- |
| SpGGP-3   | H-----  | -----        | ----- | ----- | ----- | ----- |
| SmGGP-1   | V-----  | -----        | ----- | ----- | ----- | ----- |
| SmGGP-2   | -----   | -----        | ----- | ----- | ----- | ----- |
| SmGGP-3   | -----   | -----        | ----- | ----- | ----- | ----- |
| SiGGP-1   | Q-----  | -----        | ----- | ----- | ----- | ----- |
| SiGGP-2   | -----   | -----        | ----- | ----- | ----- | ----- |
| SvGGP-1   | Q-----  | -----        | ----- | ----- | ----- | ----- |
| SvGGP-2   | -----   | -----        | ----- | ----- | ----- | ----- |
| SlGGP-1   | -----   | -----        | ----- | ----- | ----- | ----- |
| SlGGP-2   | Q-----  | -----        | ----- | ----- | ----- | ----- |
| StGGP-1   | -----   | -----        | ----- | ----- | ----- | ----- |
| StGGP-2   | Q-----  | -----        | ----- | ----- | ----- | ----- |
| SbGGP-1   | Q-----  | -----        | ----- | ----- | ----- | ----- |
| SbGGP-2   | -----   | -----L-----  | ----- | ----- | ----- | ----- |
| SfGGP-1   | QV----- | -----        | ----- | ----- | ----- | ----- |
| SfGGP-2   | -----   | -----        | ----- | ----- | ----- | ----- |
| SppGGP-1  | -----   | -----        | ----- | ----- | ----- | ----- |
| SppGGP-2  | Q-----  | -----        | ----- | ----- | ----- | ----- |
| TcGGP-1   | Q-----  | -----        | ----- | ----- | ----- | ----- |
| TcGGP-2   | Q-----  | -----        | ----- | ----- | ----- | ----- |
| TpGGP     | Q-----  | -----        | ----- | ----- | ----- | ----- |
| VvGGP-1   | Q-----  | -----        | ----- | ----- | ----- | ----- |
| VvGGP-2   | -----   | -----        | ----- | ----- | ----- | ----- |
| VcGGP     | -----   | -----        | ----- | ----- | ----- | ----- |
| ZmGGP-E-1 | P-----  | -----        | ----- | ----- | ----- | ----- |
| ZmGGP-E-2 | -----   | -----LG----- | ----- | ----- | ----- | ----- |
| ZmGGP-1   | P-----  | -----        | ----- | ----- | ----- | ----- |
| ZmGGP-2   | -----   | -----LG----- | ----- | ----- | ----- | ----- |
| ZomGGP    | Q-----  | -----        | ----- | ----- | ----- | ----- |
